# Free energy and kinetics of cAMP permeation through connexin26 hemichannel with and without voltage

Wenjuan Jiang<sup>#1</sup>, Yi-Chun Lin<sup>#1</sup>, Wesley Botello-Smith<sup>#1</sup>, Jorge Contreras<sup>\*2</sup>, Andrew L. Harris<sup>\*2</sup>, Luca Maragliano<sup>\*3,4</sup>, Yun Lyna Luo<sup>\*1</sup>

1. College of Pharmacy, Western University of Health Sciences, 309 E. Second St, Pomona, CA, USA.
2. Department of Pharmacology, Physiology, and Neuroscience. New Jersey Medical School, Rutgers, The State University of New Jersey, Newark, NJ, USA.
3. Department of Life and Environmental Sciences, Polytechnic University of Marche, Ancona, Italy
4. Center for Synaptic Neuroscience and Technology, Italian Institute of Technology, Genoa, Italy.

<sup>#</sup> contribute equally

<sup>\*</sup> corresponding authors

## Abstract

The connexin family is a diverse group of highly regulated non- $\beta$ -barrel wide-pore channels permeable to biological signaling molecules. Despite their critical roles in mediating selective molecular signaling in health and disease, the molecular basis of permeation through these pores remains unclear. Here, we report the thermodynamics and kinetics of binding and transport of a second messenger, adenosine-3',5'-cyclophosphate (cAMP), through a connexin26 hemichannel. Inward and outward fluxes of cAMP were first obtained from 4  $\mu$ s simulations with voltages and multiple cAMPs in solution. The results are compared with the intrinsic potential of mean force (PMF) and the mean first passage times (MFPTs) of a single cAMP in the absence of voltage, obtained from a total of 16.5  $\mu$ s of multi-replica Voronoi-tessellated Markovian milestoning simulations. The computed transit times through the pore correspond well to existing experimental data. Both voltage simulations and milestoning simulations revealed two cAMP binding sites with binding constants and dissociation rates computed from PMF and MFPTs. The protein dipole inside the pore produces an asymmetric PMF, reflected in unequal cAMP MFPTs in each direction once within the pore. The free energy profiles under voltages derived from intrinsic PMF provided a unified understanding of directional transition rates with/without voltage, and revealed the unique role of channel polarity and the mobile electrolyte within a wide pore on the total free energy. In addition, we show how these factors influence the cAMP dipole vector during permeation, and how cAMP affects the local and non-local pore diameter in a position-dependent manner.

## 37 **Significance Statement**

38 Connexins are wide-pore channels permeable to cellular signaling molecules. They mediate molecular  
39 signaling crucial in physiology, pathology, and development; mutations in connexins cause human  
40 pathologies. However, the fundamental structural, thermodynamic, and kinetic determinants of molecular  
41 permeability properties are unknown. Using multiple molecular dynamics simulation techniques, we  
42 report, for the first time, an in-depth investigation of the free energy and the directional transition rates of  
43 an important biological signaling molecule, cAMP, through a connexin channel. We reveal the energetics  
44 and binding sites that determine the cAMP flux, and the effects of mobile ions and external electrical field  
45 on the process. The results provide a basis for understanding the unique features of molecular flux through  
46 connexins and other non- $\beta$ -barrel wide-pore channels.

47

48

## 49 **Introduction**

50 Connexin proteins form wide channels that mediate electrical and molecular signaling through cell  
51 membranes. They can function as plasma membrane channels (called “hemichannels”) or as  
52 intercellular channels that allow direct transfer of small cytoplasmic molecules between cells. The  
53 intercellular channels (“gap junction channels”) are formed by end-to-end docking of two  
54 hemichannels across the extracellular gap between adjacent cells. The pores are relatively wide  
55 and are therefore permeable to atomic ions and small molecules in the size-range of key cellular  
56 signaling molecules including cAMP, cGMP, ATP, IP<sub>3</sub>, and glutathione. Each of the 21 human  
57 connexin isoform forms channels with distinct permeability and regulatory properties(1, 2). With  
58 the exception of electrical signaling in excitable tissues, the primary biological function of  
59 connexin channels is to mediate movement of small cytoplasmic signaling molecules between cells  
60 and/or to release them into the extracellular environment in a highly regulated manner. Mutations  
61 in connexins that alter channel function or expression produce human pathologies(3, 4). These  
62 mutations ultimately exert their pathological effects by disrupting the proper molecular  
63 permeability of junctional and plasma membranes that connexin channels mediate.

64 A large literature documents that channels formed by the different connexin isoforms have  
65 dramatically different permeability properties. Their unitary conductances range from 10 pS to  
66 300 pS, their cation/anion permeability ratios ( $P_{K^+}/P_{Cl^-}$ ) range from 8.0 to 0.8 and their

67 permeabilities to fluorescent tracers are highly disparate. Strikingly, none of these parameters  
68 correlate with each other (e.g., the connexin channel with the largest unitary conductance is among  
69 the most size-restrictive). Permeabilities to biological signaling molecules are strikingly different  
70 among the different connexin channels, but are difficult to measure quantitatively, as the molecules  
71 are not fluorescent and do not carry significant current. Furthermore, for a given type of connexin  
72 channel, there are remarkable degrees of selectivity and relative permeability among biological  
73 permeants. These connexin-specific and permeant-specific permeability properties are not  
74 reasonably inferred from differences in permeabilities to fluorescent tracers(5). This suggests that  
75 there are, as yet unknown, structural/energetic determinants of molecular permeation that impart  
76 to each type of connexin channel specific, biologically required permeability properties. The  
77 underlying mechanisms for this are unknown, in spite of their clear biomedical and therapeutic  
78 importance. Investigation of these mechanisms by mutagenesis has not been informative in the  
79 absence of an understanding of the behavior, energetics, and interactions experienced by a  
80 molecule as it traverses the pore. Computational studies can provide the basis for this  
81 understanding.

82 We previously used Hamiltonian replica-exchange umbrella sampling to explore the  
83 energetics of uncharged permeant and non-permeant tracer molecules in the connexin 26 (Cx26)  
84 hemichannel(6). That study indicated that the determinants of molecular permeation differ from  
85 those that dominate the permeation of atomic ions through commonly studied ion-selective  
86 channels, emphasizing the unique aspects of small molecules with conformational and  
87 orientational degrees of freedom in a wide pore. The free energy and calculated relative  
88 permeabilities derived from that work were consistent with experimental findings. However, while  
89 validating the atomistic system and overall computational approach, the previous work did not  
90 provide quantitative kinetic information of the permeation process. Furthermore, the results of  
91 neutral tracer molecules do not characterize the biomedically crucial process of permeation by  
92 charged biological signaling molecules. The present study explores the binding and transport  
93 kinetics of a negatively charged second messenger, adenosine-3',5'-cyclophosphate (cAMP),  
94 permeates a connexin pore.

95 A single permeation event with a timescale of sub-microsecond to microseconds is within  
96 reach of today's computational power. However, a large number of transition events are required  
97 to obtain meaningful statistics, for which simulations of orders of magnitude longer than the mean

98 transition time are required. One solution is to accelerate the permeation of charged molecules by  
99 imposing a voltage (cAMP carries a charge of  $-1e$ ). Theoretically, if the system reaches a steady  
100 state under a constant electric field and maintains symmetric concentration on both sides of the  
101 channel, a mean flux rate can be estimated from the ensemble of nonequilibrium processes using  
102 a large number of permeation events. The accumulated density of cAMP along the channel axis  
103 during these events may provide an estimate of the locations of the energetic barrier(s) and binding  
104 site(s). Alternatively, one can choose an enhanced sampling method that is suitable for computing  
105 free energy and kinetics of the permeation process. In this study, we used both approaches to gain  
106 a comprehensive understanding of cAMP permeation with and without voltage, and in presence  
107 and absence of multiple permeants.

108         A molecular permeation rate is often dominated by the free energy profile or potential of  
109 mean force (PMF) along the channel lumen axis. Previously we estimated the relative transition  
110 rates between two sugar molecules using transition state theory (TST) based on PMF profiles(6).  
111 However, TST requires assumptions such as a single dominant transition state and no re-crossing  
112 at the barriers, which are often difficult to satisfy in complex biomolecular systems with rugged  
113 free-energy landscapes. To overcome this limitation, enhanced sampling techniques have been  
114 developed to calculate transition rates from molecular dynamics (MD) simulations. Of particular  
115 interest is the milestoning method introduced by Faradjian and Elber(7), which has been developed  
116 into several versions and used in many biophysical applications(8). Voronoi-tessellated Markovian  
117 milestoning is an implementation that allows reconstruction of the long-time dynamics of a system  
118 from independent simulations confined within a set of cells spanning the space of the reaction  
119 coordinates(9). This method has successfully captured the rates of CO entry/exit in myoglobin(10),  
120 and recently the ligand binding kinetics(11). Here, we make use of the “soft-walls” version, which  
121 confines the sampling within the Voronoi cells using flat-bottom harmonic restraining  
122 potentials(12). This approach is easy to implement, allowing us to take advantage of CUDA  
123 accelerated MD packages, and has been shown to yield the same results as the original “hard-walls”  
124 version, which instead inverts atomic velocity at the cell boundaries. The “soft-walls” version has  
125 been used to study nucleation of an ionic liquid(13) and ion permeation across a claudin-15  
126 paracellular channel(14). Here we adopt this approach to explore the permeation of cAMP through  
127 a Cx26 hemichannel.

128

## 129 **Results**

### 130 **cAMP permeation under opposite voltages**

131 We first investigated inward/outward cAMP permeation rates under voltages in the presence of  
132 symmetric cAMP concentrations. To obtain a sufficient number of transition events and ensure  
133 unidirectional flux, we applied +/-200 mV transmembrane potentials to accelerate permeation. 27  
134 cAMP molecules and 27 Mg<sup>2+</sup> ions, corresponding to 26.5 mM, were present on each side of the  
135 membrane. To mimic physiological salt concentration and also to neutralize the protein charge, 82  
136 K<sup>+</sup> and 163 Cl<sup>-</sup> ions were added to the bulk aqueous compartments, corresponding to 80.5 mM K<sup>+</sup>  
137 and 160.1 mM Cl<sup>-</sup> (**Table S1**). Using  $z < |50| \text{ \AA}$  as boundaries of the hemichannel (center-of-mass  
138 of protein is at  $z=0 \text{ \AA}$ ), 9 single-molecule transitions were observed at +200 mV and 12 transitions  
139 at -200 mV during each 2  $\mu\text{s}$  simulation (**Figure 1**, **Table 1**, and raw data in **Table S2**). At each  
140 voltage, all transitions were in the same direction.

141 To estimate the uncertainty due to the small number of events, we calculated the confidence  
142 interval for the average transition time ( $\langle t \rangle$ ) of cAMP through the channel by fitting the transition  
143 times to an exponential distribution. Based on a maximum likelihood estimation, MFPT is 448 ns  
144 at +200 mV with 95% confidence interval (CI<sub>95</sub>) of 204-1646 ns, and 510 ns with CI<sub>95</sub> of 249-  
145 1571 ns at -200 mV. The average time between consecutive transition events ( $\tau$  = length of  
146 simulation/number of transits) is 222 ns at +200 mV and 166 ns at -200 mV. Given the confidence  
147 intervals, there is no significant difference in the flux in each direction. The ratio  $\langle t \rangle / \tau$  is 2.0 and  
148 3.1, for +200 mV and -200 mV, respectively, which indicates there are on average two to three  
149 cAMP molecules in the channel at any given time at each voltage. Inspection of the trajectories  
150 shows that this is only due to the accumulation of cAMP molecules at the intracellular entrance  
151 (**Figures 2 and 3**).

152 Although the experimental transition time of cAMP under voltage is not available, a  
153 cAMP/K<sup>+</sup> permeability ratio of 0.027 was reported using simultaneous measurements of Cx26  
154 junctional conductance and reporter-based intercellular transfer of cAMP(15). We calculated K<sup>+</sup>  
155 transition time in presence of 27 cAMP is  $13.1 \pm 13.0 \text{ ns}$  at +200 mV and  $6.8 \pm 7.8 \text{ ns}$  at -200 mV.  
156 If we assume the time needed to cross the junctional channel (two hemichannels docked at the

157 extracellular ends) is the sum of the transition time in two opposite directions, we obtain a  
 158 cAMP/K<sup>+</sup> ratio of 0.021, reasonably close to the experimental ratio.  
 159

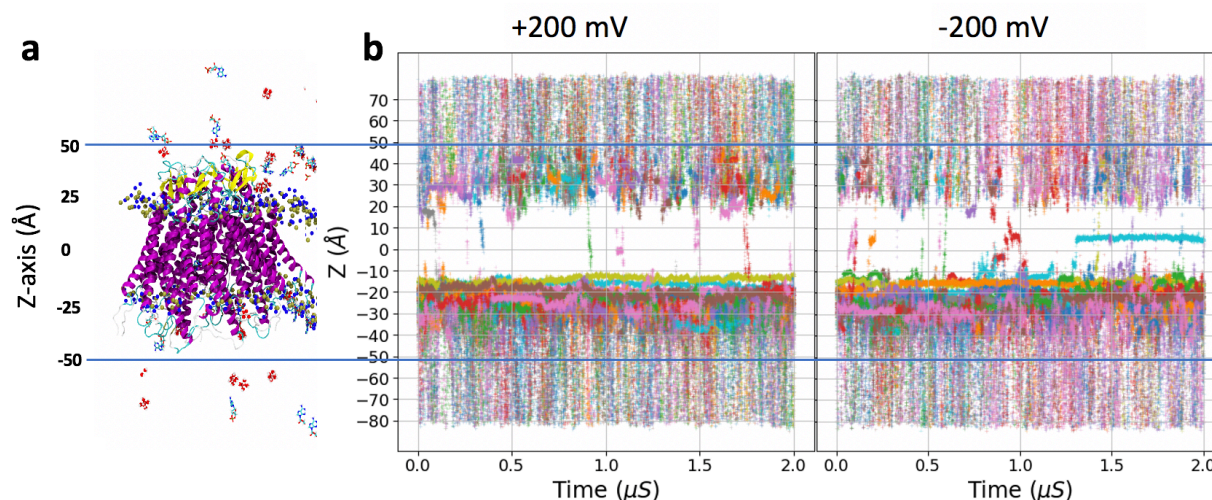

160  
 161  
 162 **Figure 1. Simulations of cAMP permeation through Cx26 at +200 mV and -200 mV membrane**  
 163 **potential. a.** Snapshot of the simulated system. Protein backbone is shown in cartoon mode and colored by  
 164 the secondary structure (helix in magenta, beta-sheet in yellow, disordered loop in cyan). cAMP molecules  
 165 are shown in licorice with atoms colored (red oxygen, cyan carbon, blue nitrogen, yellow phosphate). Lipids,  
 166 ions, and water molecules are not shown. **b.** The z-coordinates of all 27 cAMP molecules in the system  
 167 during the simulations are shown in different colors. Note that the flux of cAMP is in the direction opposite  
 168 to the field; thus, cAMP flux is inward (down in this figure) under +200 mV and outward under -200 mV.  
 169

170

171 **Table 1. Transition time of cAMP through Cx26 hemichannel under voltage.**

|                                                | <b>+200mV</b>     | <b>-200mV</b>     |
|------------------------------------------------|-------------------|-------------------|
| cAMP flux direction                            | Inward            | Outward           |
| Transition events in 2 μs                      | 9                 | 12                |
| Events per μs                                  | 4.5               | 6.0               |
| Time between transition events                 | 222 ns            | 166 ns            |
| Mean transition time (CI <sub>95</sub> ) *     | 448 ns (204-1646) | 510 ns (249-1571) |
| Mean dwell time (CI <sub>95</sub> )            | 305 ns (149-940)  | 398 ns (205-1086) |
| Mean barrier crossing time (CI <sub>95</sub> ) | 143 ns (79-330)   | 106 ns (54-290)   |

172  
 173 \*Sample mean and 95% confidence intervals are based on Maximum Likelihood Estimate by fitting the  
 174 exponential distributions. See code at [https://github.com/LynaLuo-Lab/MD-data-uncertainty-](https://github.com/LynaLuo-Lab/MD-data-uncertainty-analysis/blob/master/confidence_interval_exponential.ipynb)  
 175 [analysis/blob/master/confidence\\_interval\\_exponential.ipynb](https://github.com/LynaLuo-Lab/MD-data-uncertainty-analysis/blob/master/confidence_interval_exponential.ipynb).  
 176

176

177

## 178 Pore cAMP density profiles from voltage simulations

179 The density profiles accumulated from voltage simulations can provide an estimate of the locations  
180 of energetic barriers and binding sites. The charge densities of protein, lipids, total ions, and  
181 individual ions ( $K^+$ ,  $Cl^-$ ,  $cAMP^-$ ,  $Mg^{2+}$ ) are plotted along the channel z-axis (**Figure 2a**). It can be  
182 seen that the channel is largely positive at intracellular entrance where the highest density of  $Cl^-$ ,  
183  $cAMP^-$  ions are located. The accumulation of cAMP at the intracellular entrance can also be seen  
184 clearly in **Figure 1**. A volumetric map showing the 3D density of cAMP inside the channel from  
185 the -200 mV simulation is illustrated in **Figure 2b**. A smooth indicator of cAMP distribution is  
186 shown using Boltzmann inversion ( $-kT \ln(\rho)$ ) of the cAMP density; we will call these *log-density*  
187 *plots*. **Figure 2c** shows the 2D cAMP log-density along the z-axis and the radial axis  $R$ . **Figure 2d**  
188 shows the 1D cAMP log-density within the pore along  $z$ . Note that these density profiles are  
189 acquired from nonequilibrium simulations under the influence of voltage. They indicate how the  
190 cAMP behaves under the influence of both external voltage and the intrinsic free energy, hence do  
191 not represent the equilibrium free energy profiles. The symmetric cAMP density in the bulk  
192 regions on each side of the channel is the result of the periodic boundary condition used for MD  
193 simulations.

194 The 1D log-density profiles (**Figure 2d**) have a broad minimum at the intracellular entrance  
195 of the channel and a major peak in the middle of the channel. The shapes of the global minimum  
196 region are essentially identical under both voltages. There is a second well in the -200 mV density  
197 that appears to bisect the central peak. The dwell times of cAMP (**Table 1**) at the broad minimum  
198 ( $-50 < z < 10$  Å) are quite large under both voltages: 305 ns at +200 mV, and 398 ns at -200 mV  
199 (**Table 1**). In contrast, the rest of the channel region ( $-10 < z < 50$  Å), which contains the major  
200 barriers, was crossed by cAMP more rapidly: 143 ns for inward flux (at +200 mV), and 106 ns for  
201 outward flux (at -200 mV).

202 The broad binding well ( $-50 < z < -10$ ) present at both voltages is located in the C-terminal  
203 regions of the second transmembrane helix (TM2) and the N-terminal helix (NTH). Contact  
204 frequency analysis between cAMPs and protein sidechains indicates that cAMP bind to R99/104  
205 and K103 on TM2 over 70% of the simulated time, and bind to K102 and R98 on TM2, and K15  
206 on NTH over 30% of the time (**Figure 3a**), thus providing a basis for the cAMP accumulation at  
207 this region. Further investigation revealed that the cAMP forms clusters between  $-30 < z < 0$  Å, while  
208 almost no clusters are found in the rest of the channel (**Figure 3b**). Most of the clusters contain 2

209 cAMPs, which interact through pi-stacking of adenosine rings. Clusters of 3 cAMPs forming  
210 hydrogen bonds with each other also exist (**Figure 3c**). These clusters are not seen in the bulk. It  
211 appears that the positively charged residues at the intracellular entrance of the pore facilitate cAMP  
212 clustering by reducing the translational and rotational entropy of the molecules. To check whether  
213 this accumulation produce a “crowding” effect on entry into the pore, we compared the unoccupied  
214 lumen radius with and without cAMP molecules present. **Figure S1** suggests that the accumulation  
215 of cAMP had little effect on the average available cross-sectional area at the pore entrance. In  
216 addition, the peaks in the two log-density profiles (**Figure 2d**) do not closely correlate with the  
217 narrow regions of the pore (see **Figure S1 and Figure 8a** for two different radius measurements),  
218 indicating that steric hindrance is not a major contributor to the cAMP transition barrier.  
219



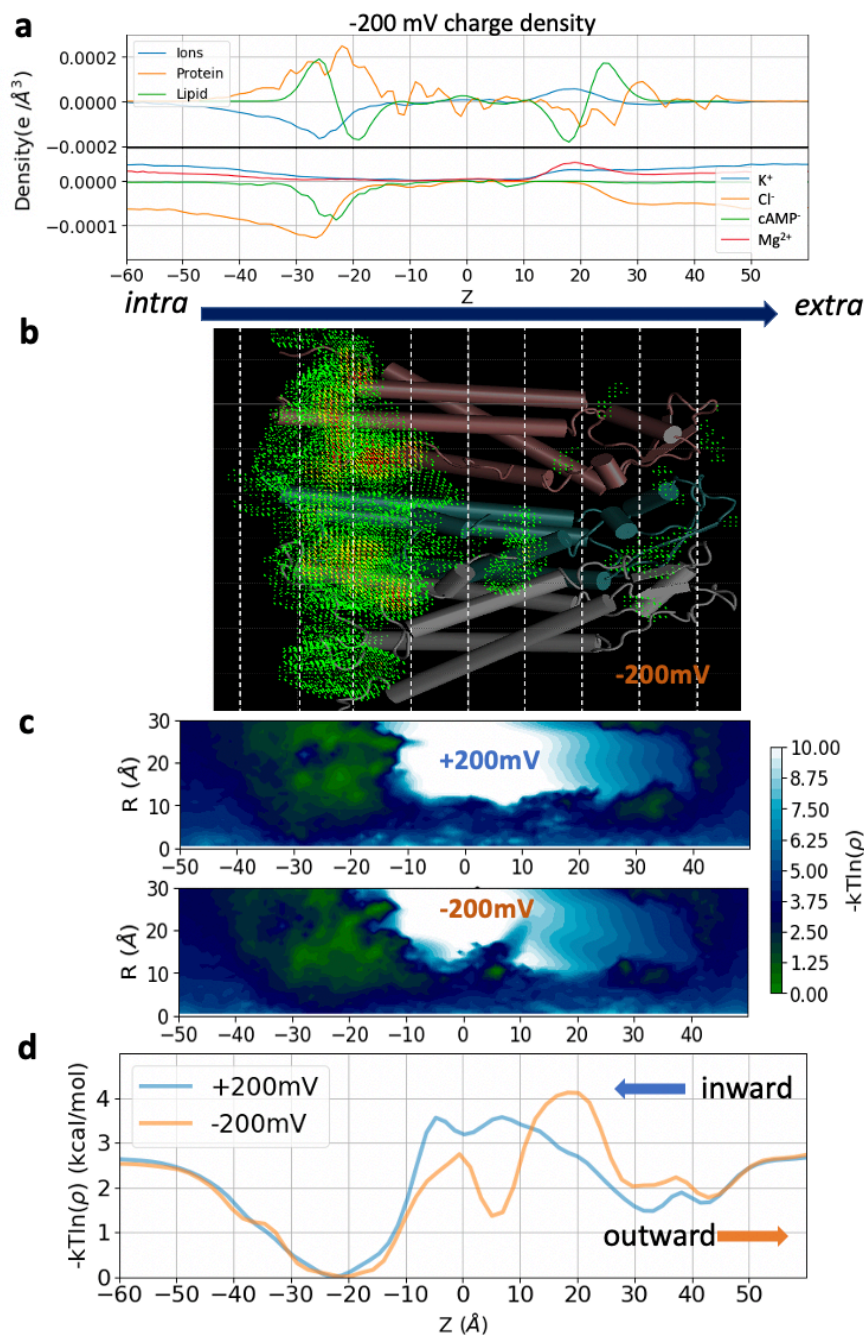

220

221 **Figure 2. Charge density profile and cAMP log-density profiles in 3D, 2D, and 1D.** **a.** Charge density  
 222 profiles of protein, lipids, total ions and individual charges groups ( $K^+$ ,  $Cl^-$ ,  $cAMP^-$ ,  $Mg^{2+}$ ) along the channel  
 223 z-axis obtained from the -200 mV trajectory. **b.** Volumetric map of cAMP 3D density under -200 mV  
 224 simulation. **c.** Boltzmann inversion  $-kT\ln(p(z))$  of the accumulated cAMP density profile in 2D along the  
 225 channel z-axis and radial axis R. **d.** 1D log-density plot of the cAMP density profile within the pore along  
 226 the channel z-axis. Arrows indicate the direction of cAMP flux at each voltage. Note: **a** represents charge  
 227 density in the entire simulation system, while **b**, **c**, and **d** depicts the cAMP density only within the pore  
 228 using the same cylindrical radius cutoff of 30  $\text{\AA}$  as in the milestoning simulation below.

229

230

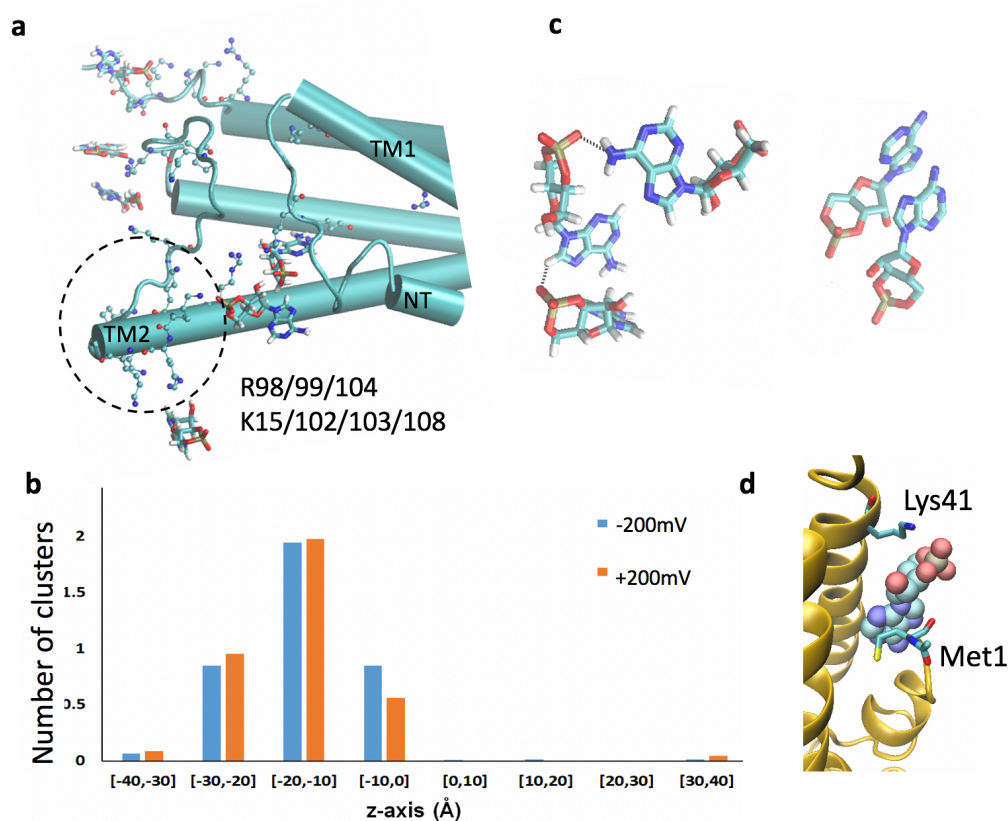

231

232 **Figure 3. Permeant-permeant interactions and permeant-channel interactions.** **a.** Snapshot showing  
 233 cAMP molecules (in licorice) near positively charged residues (in CPK mode) at the intracellular entrance.  
 234 Protein is in cartoon mode. **b.** Number of cAMP clusters in each 10 Å window during +/-200 mV  
 235 simulations. A cluster is defined as at least two cAMP molecules with centers of mass within 20 Å at any  
 236 time during the simulations. **c.** Snapshots of two cAMPs clustered via pi-stacking and three cAMPs  
 237 clustered via hydrogen bonds. **d.** Snapshot showing one cAMP trapped between Lys41 and Met1.

238

239

240 During one of the 12 permeation events at -200 mV simulation, one cAMP was trapped  
 241 between Met1 in the N-terminal helix (NTH) and Lys41 on the first transmembrane helix (TM1)  
 242 (Figure 1b, 3d). This was reflected in the density profile as a large dip in the peak at  $z=5$  Å (Figure  
 243 2d). Both NTH and Lys41 have been suggested to be involved in voltage-sensing in Cx26(16, 17).  
 244 This raised the question of whether the instance of a long residency of a cAMP molecule at this  
 245 particular position at -200 mV, but not evident at +200 mV or 0 mV (from PMF milestone below)  
 246 is a consequence of voltage-driven repositioning of these charged moieties. To evaluate their  
 247 responses to the local electric field, we plotted the angles between the z-axis and the principal

248 vector of Lys41 or NTH (residues 1 to 11) during 2  $\mu$ s simulations at  $\pm$ 200 mV (**Figures S2a**  
249 **and S2b**). Except for a clear reduction in Lys41 fluctuation in subunit 5, where the cAMP was  
250 trapped, there is no clear preference in the orientation of the Lys41 or NTH in response to the two  
251 opposite voltages. Therefore, this trapped cAMP is unlikely to be due to the effect of voltage on  
252 the protein. Of course, this result does not indicate that the NTH and Lys41 are uninvolved in  
253 voltage-sensing, only that they did not respond to  $\pm$ 200 mV within the 2  $\mu$ s simulations.

254

### 255 **cAMP permeation free energy using Markovian milestoneing**

256 The simulations above provide a nonequilibrium view of the cAMP transition process driven by  
257 voltage. Two opposite voltages resulted in similar cAMP density profiles and similar ranges of  
258 flux rates at each voltage. However, the small number of stochastic events (21 in total) led to the  
259 large uncertainty in the mean passage time of the transition event. In contrast to a long trajectory  
260 exploring the whole channel, multiple MD simulations confined in intervals partitioning the space  
261 can offer sufficient statistics within a shorter running time. Here, we used Voronoi-tessellated  
262 Markovian milestoneing MD simulations (hereafter referred to as milestoneing simulation) on a  
263 tessellation along the z-coordinate of the center-of-mass of a single cAMP to estimate the PMF  
264 and the kinetics of permeation through the channel at zero membrane voltage.

265 **Figure 4** shows the 1D PMF (in red) obtained from the equilibrium probability of finding  
266 cAMP in each milestoneing cell. This PMF of a single cAMP permeating without applied voltage  
267 has features similar to the log-density plots of the accumulated density of cAMP from the voltage  
268 simulations. A free energy barrier spans between  $-20 < z < 30$  Å, with the peak located at  $z = +20$  Å,  
269 the same as the peak in log-density from the -200 mV simulation. The height of the barrier relative  
270 to bulk (1.2 kcal/mol) is slightly lower than in -200 mV log-density (1.8 kcal/mol) and higher than  
271 in +200 mV (0.8 kcal/mol). The major well on around  $z = -20$  Å from voltage simulations are  
272 much broader and more favorable (-2.8 kcal/mol relative to bulk) than the well in the PMF (-2  
273 kcal/mol), likely due to the cAMP clustering, which is absent in the single cAMP milestoneing. The  
274 dip that split the peak at  $z = +5$  Å under -200 mV also shows up in the PMF, but with much smaller  
275 magnitude. It is thus possible that the magnitude of the dip at -200 mV in the log-density plot is  
276 overestimated due to the contribution of the single, rare event of cAMP trapping (evident in **Figure**  
277 **1b**).

278 Similar to the voltage simulations, milestoning simulation without voltage reveals two  
279 binding sites for cAMP, a major one (site 1) near the intracellular entrance between NT and TM2  
280 (-2 kcal/mol relative to bulk value) and a (bisected) much smaller one (site 2) at the extracellular  
281 loop (E1) region (-0.7 kcal/mol relative to bulk). The single cAMP dissociation constant,  $K_D$ , can  
282 be estimated from the single cAMP equilibrium PMF using Eq. 1:

$$283 \quad 1/K_D = \pi R^2 \int_{z_{min}}^{z_{max}} dz e^{-W(z)/k_B T} \quad \text{Eq. 1}$$

284  $W(z)$  is the PMF with bulk as reference.  $R$  is the radius of a cylindrical restraint (30 Å). Integrals  
285 over individual energy wells indicate that cAMP will bind to the intracellular site (binding site 1:  
286  $-43.4 < z < 18.6$  Å) with  $K_D$  of 1.8 mM and to the extracellular site (binding site 2:  $18.6 < z < 60.6$  Å)  
287 with  $K_D$  of 7.3 mM (**Figure 4a**). The integral over the entire PMF yields a total  $K_D$  of 1.4 mM for  
288 the channel. Thus, at the bulk cAMP concentration of the voltage simulations (26.5 mM), both  
289 binding sites are likely highly occupied, while at the concentration equivalent to the single cAMP  
290 used in milestoning (1 mM), none of the binding sites would be occupied more than 50%.

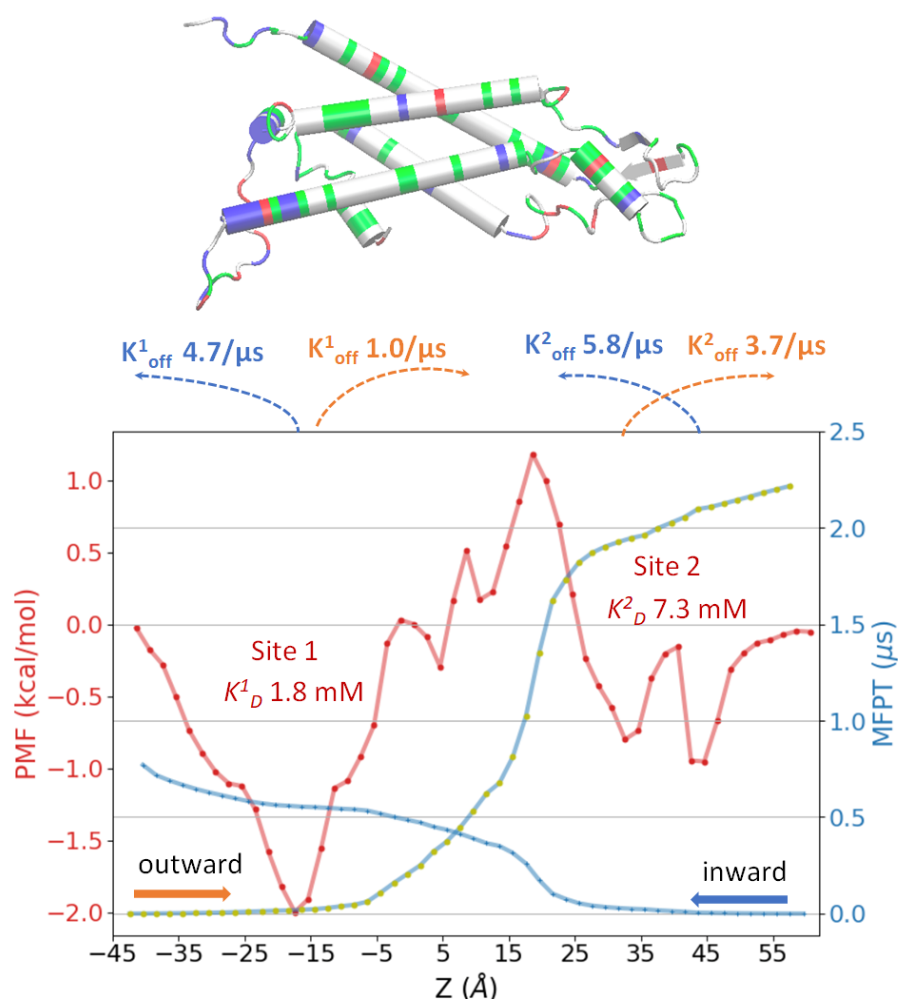

291

292 **Figure 4. Free energy and kinetics of a single cAMP permeation through Cx26 hemichannel from**  
293 **milestoning simulation ( $V=0$  mV).** Potential of mean force (PMF) in red, inward mean first passage  
294 times (MFPT) in blue, and outward MFPT in yellow dotted blue line. Binding constants and dissociation  
295 rates derived from PMF and MFPT profiles are indicated. The graphic at the top shows the backbone of  
296 one Cx26 subunit with z-positions aligned with the plot below (basic residues in blue, acidic in red, polar  
297 in green, and nonpolar in white).

298

299

### 300 **cAMP permeation kinetics using Markovian milestoning**

301 According to the MFPT profiles in **Figure 4**, from the first to the last milestone at the  
302 boundaries of the channel, it takes about  $0.77 \mu\text{s}$  for inward flux and  $2.22 \mu\text{s}$  for outward flux.  
303 Thus, the inward flux is 2.9 times faster than outward flux once a single cAMP enters the channel.  
304 The faster inward than outward flux is the direct consequence of the asymmetric channel, reflected  
305 in the asymmetric PMF showing a maximum of  $3.2$  kcal/mol barrier for outward flux, which takes

306 1.0  $\mu\text{s}$  to cross, while the two smaller barriers of 2.0 kcal/mol for inward flux only take 212 ns (site  
307 1) and 145 ns (site 2) to cross. MFPT profiles can provide direct information about the dissociation  
308 rate ( $k_{\text{off}}$ ) of a single cAMP. For outward permeation,  $k_{\text{off}}^1$  for binding site 1 is  $1.0 \mu\text{s}^{-1}$  ( $-17.4$   
309  $<z<18.6$ ) and  $k_{\text{off}}^2$  for binding site 2 is  $3.7 \mu\text{s}^{-1}$  ( $32.6 <z<60.6$ ). For inward permeation,  $k_{\text{off}}^1$  is  $4.7$   
310  $\mu\text{s}^{-1}$  ( $-41.4 <z<-17.4$ ) and  $k_{\text{off}}^2$  is  $3.7 \mu\text{s}^{-1}$  ( $18.6 <z<42.6$ ). With the equilibrium constant  $K_D$  from  
311 PMF, we can also estimate the association rate  $k_{\text{on}}^1$  of  $0.6 \mu\text{s}^{-1}\text{mM}^{-1}$  and  $k_{\text{on}}^2$  of  $0.5 \mu\text{s}^{-1}\text{mM}^{-1}$  for  
312 outward permeation, and  $k_{\text{on}}^1$  of  $2.6 \mu\text{s}^{-1} \text{mM}^{-1}$  and  $k_{\text{on}}^2$  of  $0.8 \mu\text{s}^{-1} \text{mM}^{-1}$  for inward permeation.

313 It should be noted that the MFPT is subjected to the condition that the channel is occupied  
314 by only one permeating molecule at any time. Thus, it only represents the transit time of a single  
315 permeant traversing an otherwise permeant-free channel. The full kinetics and flux at finite bulk  
316 concentrations of the permeant also depend on bulk diffusivity and concentration, and the  
317 diameters of the entrance at each end of the pore. For instance, diffusion current to a disk-like  
318 adsorber is  $I=4DRC$ , where  $C$  is the permeant concentration in the infinite bulk,  $D$  is bulk diffusion  
319 constant, and  $R$  is the radius of the disk-shaped absorber(18). Interestingly, for Cx26 hemichannel,  
320 the intracellular entrance (radius  $R=25 \text{ \AA}$ ) is larger than the extracellular entrance ( $R=10 \text{ \AA}$ ) (see  
321 pore radius in Figure 8a). Taking into account the effective radius of cAMP as  $r=3 \text{ \AA}$  (calculated  
322 from radius of gyration), the effective pore radii are  $22 \text{ \AA}$  and  $7 \text{ \AA}$  for the intracellular and  
323 extracellular pore entrances, respectively, indicating that it is  $\sim 3$  fold more likely for cAMP to  
324 reach the pore by random diffusion from bulk to the intracellular than the extracellular side.

325 Quantitative experimental measurements of the flux of cAMP through Cx26 channels in  
326 cells are very complex and subject to a variety of potential confounding factors (5). Two studies,  
327 which used different indirect strategies to report cAMP flux through junctional channels in the  
328 absence of junctional voltage, yielded estimates of cAMP permeability that differed by nearly a  
329 factor of 8 ( $6.2$  and  $47 \times 10^{-3} \text{ um}^3 \text{ sec}^{-1}$ ) (15, 19). Using the volume of the Cx26 channel obtained  
330 from the simulations, these permeability predict cAMP transit rates through junctional channels of  
331  $14 \mu\text{s}$  and  $1.9 \mu\text{s}$ , respectively, which bracket the  $\sim 3 \mu\text{s}$  transit time inferred from our studies (sum  
332 of hemichannel “outward” and “inward” transit times of  $0.77$  and  $2.22 \mu\text{s}$ ).

333

334

### 335 **Influence of voltages on free energy profile**

336 The milestoning simulations at zero voltage yielded an inward transition time is 2.9 times faster  
337 than the outward transition time (0.77 vs 2.22  $\mu$ s). Interestingly, the mean inward/outward barrier  
338 crossing time under voltages are quite similar: 143 ns (CI<sub>95</sub> 79-330 ns) at +200 mV, and 106 ns  
339 (CI<sub>95</sub> 54-290 ns) at -200 mV (**Table 1**). Below we show that this is likely due to the negative  
340 voltage reducing the free energy barrier for cAMP outward flux.

341 It has been shown previously that the total PMF under voltage  $W_{tot}(z)$  can be computed  
342 as the sum of the intrinsic PMF in the absence of external field  $W_{eq}(z)$  (in this case the equilibrium  
343 PMF derived from milestoning), and the additional potential introduced by the external field  
344  $q\delta\phi(z)$  (Eq. 2)(20-22). This additional potential has two components. One is the constant electric  
345 field throughout the entire simulated periodic cell  $E=V(z)/L_z$ , where  $V(z)$  is the voltage linear to  
346  $L_z$ , the length of the PBC box in the  $z$ -direction. The other component is the reaction potential due  
347 to the voltage-induced changes of the spatial distribution and orientation of the water dipole and  
348 mobile ions, as well as flexible and charged atoms in the protein and membrane(23). This approach  
349 presumes that the channel and the permeant do not undergo substantial conformational changes  
350 due to the external field within the time of simulation (2  $\mu$ s in this case). This assumption is  
351 supported by our results from +/- 200mV simulations showing highly similar cAMP density  
352 distribution (**Figure 2**) and pore radius profile (**Figure S1**).

353

$$354 \quad W_{tot}(z) = W_{eq}(z) + q\delta\phi(z) = W_{eq}(z) + q(V(z) + \phi_v(z) - \phi_0(z))$$

355 Eq. 2

356 The reaction potential introduced by external field may be approximated by the difference  
357 in electrostatic potential in presence and absence of the external potential,  $\phi_v(z) - \phi_0(z)$ . To  
358 calculate this difference in electrostatic potential, three additional 100 ns simulations at -200, 0,  
359 +200 mV were carried out for the same system but without cAMP. 3D electrostatic potential maps  
360  $\phi(r)$  were calculated based on all charged atoms in the simulated system  $\rho_i(r)$  by solving the  
361 Poisson equation  $\nabla^2\phi(r)=-4\pi\sum_i\rho_i(r)$  on a 1 Å resolution grid using the VMD PMEpot plugin(24).  
362 **Figure 5a** and **5b** show the 1D potential along the central pore  $z$ -axis without voltage (in blue) and  
363 under +/-200 mV (in orange).

364

365

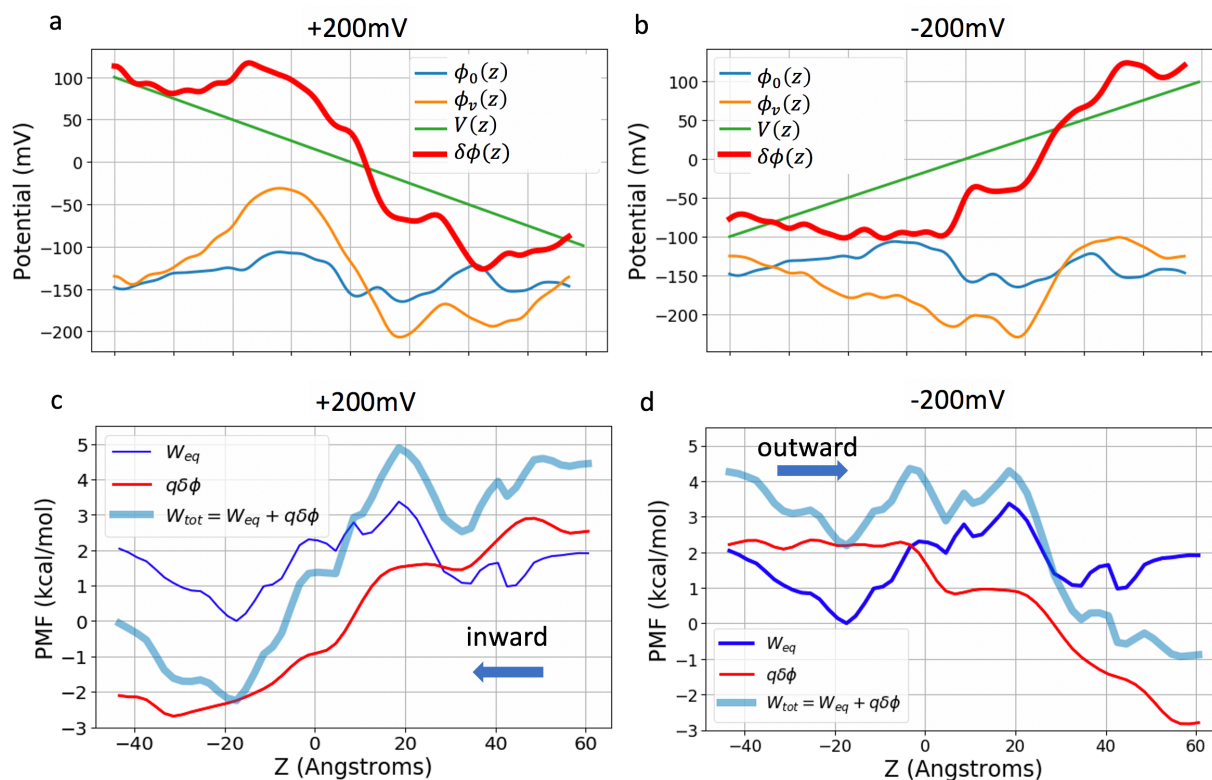

366

367 **Figure 5. Electrostatic potentials and PMFs under voltages. a,b:** applied potential in green (+/-200 mV)  
 368 and the electrostatic potential under voltage  $\phi_v(z)$  in orange, and without voltage  $\phi_0(z)$  in blue. The sum of  
 369 applied potential and reaction potential (see Eq. 2) is shown in red. **c,d:** Total PMF under a constant electric  
 370 field,  $W_{tot}(z)$ , from the intrinsic PMF in absence of an electric field  $W_{eq}(z)$ , and the additional electrostatic  
 371 potential energy introduced by the applied field  $q\delta\phi(z)$ .

372

373

374 Cx26 is largely positive in the intracellular side ( $-40 < z < 0$ ), negative near the extracellular  
 375 side ( $15 < z < 25$ ), and slightly positive near extracellular entrance ( $25 < z < 35$ ) (**Figure 2a**), thus it  
 376 has an overall dipole vector pointing towards the positive  $z$ -direction. Consequently, within the  
 377 protein-membrane region, positive voltage produces a potential  $\phi_v(z)$  that enhances the protein  
 378 dipole, while the one from negative voltage counters the protein dipole (**Figure 5ab** orange lines).  
 379 In the bulk region and lipid headgroup region ( $z > |15|$ ), the  $\phi_v(z)$  nearly cancels out the external  
 380 field  $V(z)$ . The sharp drop of the  $\phi_v(z)$  under +200 mV can be visualized on 2D-electrostatic  
 381 potential maps of the whole system (**Figure 6a**), and the 3D-electrostatic potential overlaid onto  
 382 the solvent mass density iso-surface (**Figure 6b**) or onto the cAMP density iso-surface (**Figure**  
 383 **6c**).



384 **Figure 5 cd** show the total PMF under each voltage  $W_{tot}(z)$  obtained from Eq. 2. Clearly,  
385 +200 mV facilitates the inward flux of the negatively charged cAMP by increasing the free energy  
386 on the extracellular side of the protein ( $z>0$ ) and decreasing the free energy on the intracellular  
387 side ( $z<0$ ). The two inward flux energy barriers remain similar to those of the intrinsic PMF ( $\sim 2.3$   
388 kcal/mol). However, the outward  $W_{tot}(z)$  at -200 mV significantly reduced the outward barrier  
389 from 3.2 kcal/mol of the intrinsic PMF to 2.3 kcal/mol. Thus, the asymmetry of the inward vs.  
390 outward MFPTs of cAMP within the pore at zero voltage is eliminated by the external voltage.  
391 This “voltage-equalizing” effect of permeation kinetics is a unique feature of large-pore channels  
392 that have a protein dipole and mobile electrolytes inside the pore.  
393  
394

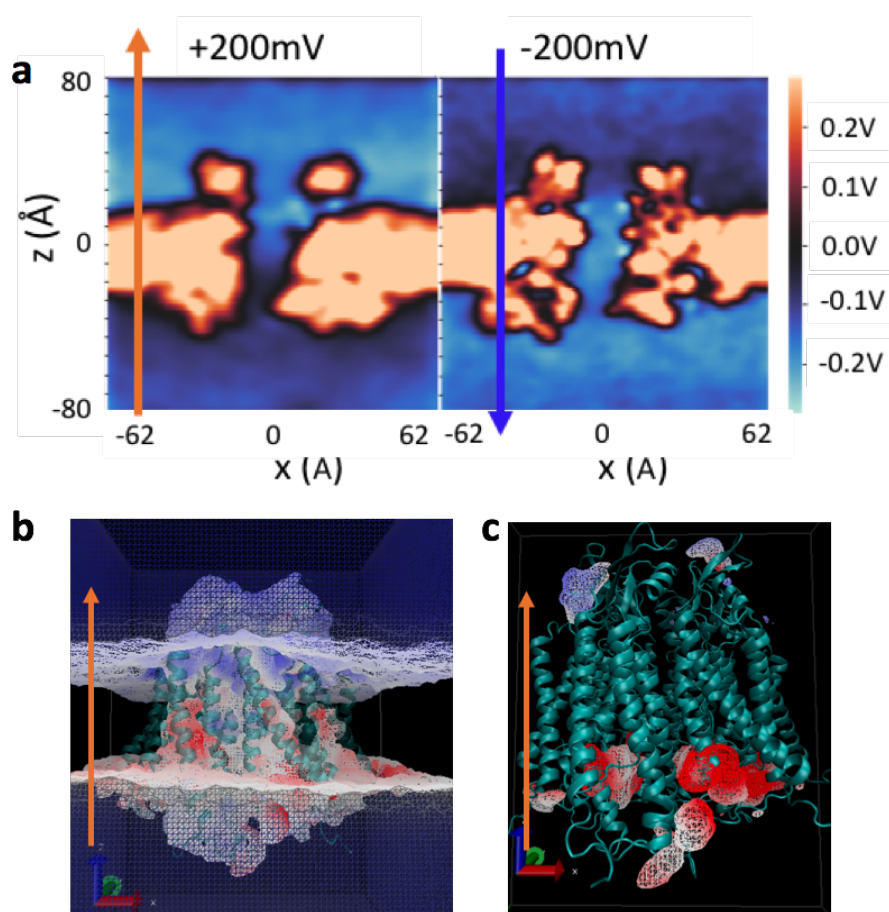

395  
396 **Figure 6. Electrostatic potential at +200 mV and -200 mV membrane potential. a.** 2D-electrostatic  
397 potential maps (vector 1,0,1 in Cartesian space) at +/-200 mV voltage. **b.** The 3D-electrostatic potential at  
398 +200 mV overlaid onto the solvent mass density iso-surface. The color scale is -12.11 to 32.95  $kT/e$  (-323  
399 to +880 mV) from blue to red. Only the electrostatic potential at +200 mV is shown here as the color change

400 in -200 mV is much less prominent (due to the opposite orientation of the intrinsic dipole as described in  
401 the text). **c.** Electrostatic potential overlaid onto the cAMP density iso-surface at +200 mV. The color scale  
402 is -267 to +267 mV. The iso-surface contour cutoff is 0.1 amu/Å<sup>3</sup> for panels b and c. All data in this figure  
403 are calculated from the 3D electrostatic potential map  $\phi(r)$  based on all charged atoms in the simulated  
404 system by solving Poisson's equation on a 1 Å resolution grid using the VMD PMEpot plugin. PMEpot  
405 approximate point charge by a spherical Gaussian with an Ewald factor of 0.25.  $\phi(r)$  is reported as the  
406 average of 1000 snapshots from the last 200 ns.

407

408

### 409 **cAMP dipole orientations during transit with and without voltage**

410 cAMP is a fairly rigid molecule with a dipole moment of 37.1 Debye. **Figure 7a** shows the  
411 probability distribution of the angle between the cAMP dipole vector and the z-axis from  
412 milestoning simulations. Strikingly, the cAMP molecule rotates nearly 180 degrees five times on  
413 its way through the pore (-40~-20, -20~0, 0~10, 10~20, and 20~40 Å along the z-axis, also see  
414 **Video1**). To understand this, the z-components of the force vector acting on the cAMP from the  
415 rest of the system (protein, water, ions, lipids) are decomposed into electrostatics and vdW terms  
416 and plotted for each milestoning cell (**Figure 7b**). The reciprocal forces of electrostatics and vdW  
417 terms along the channel indicate that cAMP has close interaction with the walls of the pore lumen.  
418 The positive forces push cAMP in the positive z-direction, thus facilitating outward permeation,  
419 while the negative force facilitates inward permeation towards the negative z-direction. The cAMP  
420 dipole rotates as the electrostatic force vector switches the sign. Thus, these re-orientations of  
421 cAMP dipole vector in absence of external voltage are due to the local electric field along the pore  
422 lumen.

423 What is the cAMP dipole orientation during the voltage induced transition? **Figure 7c**  
424 shows scatter plots of dipole vectors of permeating cAMP molecules from the two voltage  
425 simulations. Between the intracellular entrance and the major binding site (-40~-15 Å), dipole  
426 angles show orientation under both voltages similar to those at zero voltage, likely due to the large  
427 magnitude of the channel local field. While the sampling is scarce in the barrier crossing region (-  
428 20<z<20 Å), cAMP shows a clear preference in orientation at z~0 and at z~25-30 Å, adopting the  
429 opposite orientation under the two voltages. Thus, this position-dependent dipole orientation of  
430 the permeant is under the influence of both channel's internal field and external voltage.

431

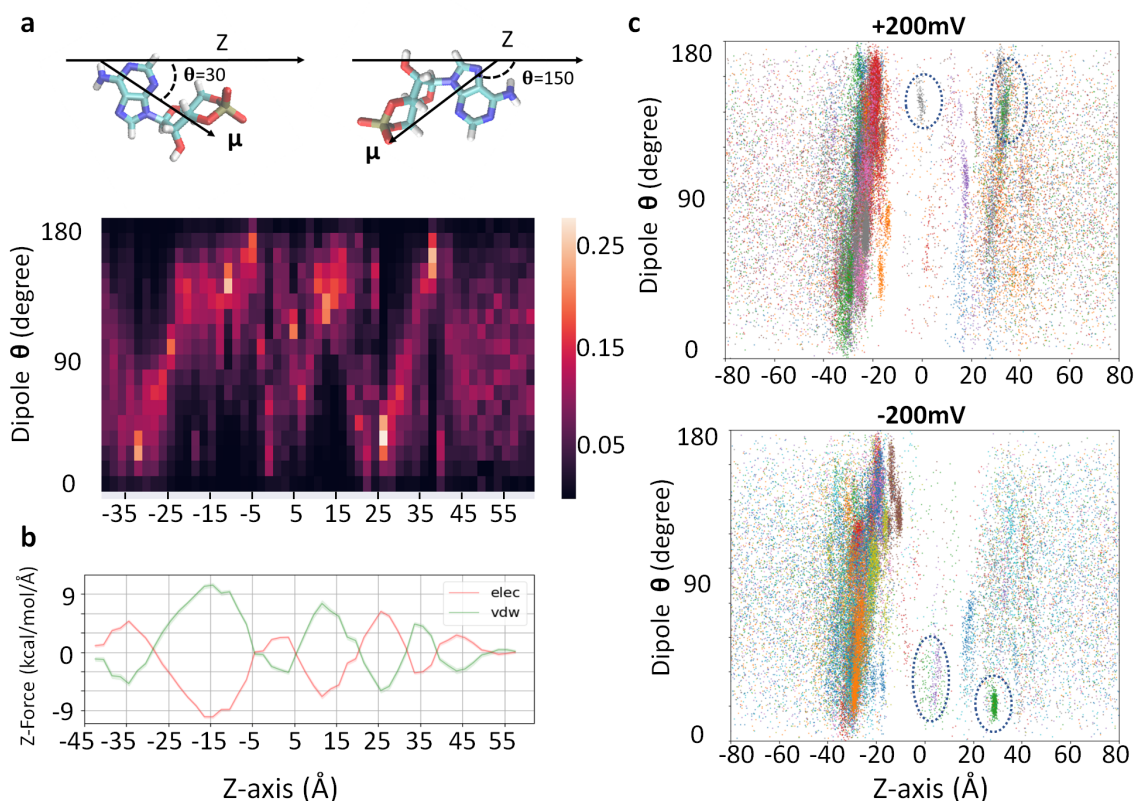

432

433 **Figure 7. Dipole moment distribution and force decomposition for cAMP molecules along z-axis (Å).**

434 **a.** cAMP dipole angles are shown as a probability distribution for each milestone simulation cell along  
435 the z-axis. Color bar shows the probability scale, lighter color represents higher probability. Representative  
436 dipole angles are illustrated on the cAMP molecule above. **b.** Mean electrostatic and vdW forces along z-  
437 axis on cAMP. Lines represent the running average of three milestone cells and shaded areas represent  
438 standard error of mean within each milestone cell. **c.** Dipole angle scatterplot of permeating cAMP at -  
439 200 mV and +200 mV voltage simulations, respectively.

440

441

## 442 **Position-dependent influence of cAMP on pore radius**

443 The presence of cAMP at different locations inside the pore may have local or non-local  
444 effect of the pore radius. To investigate the local effect, we first compared the mean and standard  
445 deviations of the pore radius along the length of the pore, without cAMP (**Figure 8a** black), and  
446 the radius at the position of the cAMP (**Figure 8a** blue). Notice that these pore radii, obtained  
447 using grid-based cavity search program `trj_cavity(25)` ranged between 10 to 15 Å, larger than the  
448 7.5 to 10.5 Å radius obtained using the Hole program (**Figure S1**). This is because the Hole  
449 algorithm uses a spherical probe of increasing radius, which underestimates the space within an

450 irregularly shaped pore. It is clear that the influence on pore radius depends where cAMP resides.  
451 For instance, the radius increases when cAMP is around  $z=-10$  Å but decreases when it is around  
452  $z=30$  Å, near the extracellular entrance of the pore.

453 To investigate the non-local effect of cAMP on pore radius, we used Cohen's d-score of  
454 pore radius distributions to compare the mean radius with and without cAMP. **Figure 8b** is a heat  
455 map of Cohen's d-score, which depicts the changes in pore diameter along its length (x-axis of  
456 Figure 8b) caused by the presence of cAMP at each z-position (y-axis of Figure 8b). Cohen's d  
457 score was calculated using Eq. 3:

$$458 \quad \text{Cohen's } d(z) = \frac{\langle r'(z) \rangle - \langle r(z) \rangle}{SD_{pooled}} \quad \text{Eq. 3}$$

459

460 where  $\langle r(z) \rangle$  is the average pore radius without cAMP (**Figure 8a** black) and  $\langle r'(z) \rangle$  is the  
461 average pore radius with cAMP at various locations of the pore, obtained from milestone  
462 simulation trajectories.  $SD_{pooled}$  is the pooled standard deviation of  $r'(z)$  and  $r(z)$ . For instance,  
463 a d score of 6 (blue) means the presence of cAMP increased the mean pore radius by  $6SD_{pooled}$ ,  
464 and a score of -6 (green) means the presence of cAMP decreased the mean pore radius by  
465  $6SD_{pooled}$ .

466 On the heatmap, the d score colors along the diagonal line represent changes in pore radius  
467 at the position of the cAMP, corresponding to the **Figure 8a** blue profile. The off-diagonal colors  
468 represent non-local changes in pore radius away from where the cAMP is in the pore. It is evident  
469 that the presence of cAMP can have effects on lumen radius distant from the position of cAMP  
470 itself. Most interestingly, the scores on the upper off diagonal are more populated by green color  
471 and lower off diagonal shows more blue color. This trend suggests that when cAMP permeates  
472 through the pore, it tends to enlarge the radius on the left side (towards intracellular) and narrow  
473 the radius on the right side (towards extracellular).

474

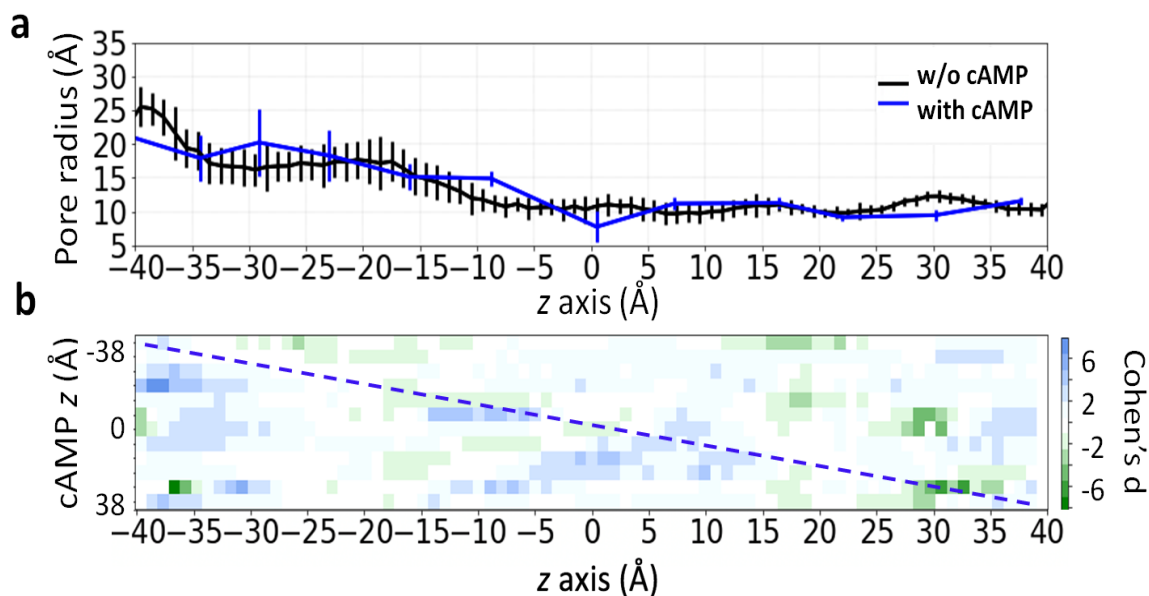

475  
476 **Figure 8. Local and non-local effect of cAMP on Cx26 pore radius.** **a.** The mean and standard deviation  
477 of Cx26 pore radius as a function of the pore axis (z) during simulations. Black line is the pore radius  
478 without cAMP and the blue line is the radius at the position of the cAMP. **b.** Cohen's d-scores of pore  
479 radius distributions (see Eq. 3). The y-axis indicates the z-position of the cAMP, and x-axis is the full-  
480 length pore axis. The dashed diagonal line indicates changes in pore radius at the position of the cAMP,  
481 while off-diagonal colors indicate cAMP's non-local effect on the pore radius. Blue color indicates cAMP  
482 increase the pore radius, and green color indicates cAMP decrease the pore radius.

483

484

## 485 Discussion

486 In this work, we use both long-timescale MD simulations and Voronoi-tessellated Markovian  
487 milestoning, an enhanced sampling method, to explore how a charged biological signaling  
488 molecule, cAMP, permeates a connexin pore. This work builds on our previously developed Cx26  
489 hemichannel model that was validated regarding ionic and molecular permeation properties (6, 26).  
490 We first obtained the density profile and the inward/outward cAMP flux under +/-200 mV voltages  
491 from two 2  $\mu$ s MD simulations in the presence of multiple cAMPs. These results were compared  
492 with the intrinsic potential of mean force (PMF) and the inward/outward mean first passage time  
493 (MFPT) of a single cAMP at zero voltage obtained from a total 16.5  $\mu$ s of multi-replica milestoning.  
494 Those two computational approaches – long timescale under voltage (nonequilibrium) and  
495 milestoning without voltage (equilibrium) - provided complementary information that allowed  
496 detailed analysis of the kinetics of cAMP transit in the absence and presence of voltage. The  
497 relation between voltage simulations and milestoning simulations were investigated by deriving

498 the PMF under voltage from the intrinsic PMF, which revealed how mobile ions and protein dipole  
499 contribute to the resulting free energy landscape. In addition, unbiased simulations within each  
500 milestone cell allowed us to examine the dipole orientation of cAMP through the pore, with and  
501 without voltage, and the short-range and long-range effects of cAMP on pore width.

502 Both +/-200 mV simulations in 26.5 mM cAMP and single cAMP milestone simulation  
503 featured a prominent intra-pore binding site, characterized by a high density of positive charge in  
504 a wide entrance region of the pore. The PMF and MFPT from milestone further allow us to  
505 estimate the binding constants, dissociation and association rates of cAMP inside the channel.  
506 Because this site directly communicates with the bulk aqueous compartment, the “saturability” of  
507 this site is expected to be more complex than for a single-occupancy ion binding site in a narrow  
508 pore. The results also suggest that while more than one cAMP can be within the pore, this multiple  
509 occupancy only occurs at this wide binding site, and that there is single cAMP occupancy in the  
510 rest of the pore. Thus, we do not anticipate for cAMP the types of multi-occupancy effects seen in  
511 many ion channels that involve interactions between sequential single-occupancy binding sites in  
512 the permeation path.

513 At the cAMP concentration used in the voltage simulations, we noted that there were self-  
514 interactions among the cAMP molecules at the pore entrance (and not in bulk); cAMP molecules  
515 interacted with each other via pi-stacking and hydrogen bonding. This was likely due to the 26.5  
516 mM bulk concentration of cAMP used to obtain a measurable number of transits during the voltage  
517 simulation, which was greatly increased at the pore entrance. Although  $Mg^{2+}$  ions were included  
518 in all simulations, they did not play a role in cAMP clustering or permeation. The cAMP self-  
519 interactions are unlikely to occur at any physiological cAMP concentrations. However, this finding  
520 does point out a caution when a high concentration of ligands is used in computations to speed up  
521 the sampling.

522 While the cAMP binding sites and barriers are consistent between nonequilibrium  
523 simulation and milestone simulation, the kinetic features are different. Under equilibrium  
524 simulation, the cAMP transit time is ~3 times faster inward than outward. This asymmetric rate is  
525 not seen under voltage simulations. By exploring how voltages influence the permeation free  
526 energy, we found this is likely due to the negative voltage reducing the free energy barrier for  
527 outward cAMP flux. The influence of the voltage of the free energy profile of cAMP permeation  
528 was estimated using intrinsic PMF from milestone and the electrostatic potential change induced

529 by the electric field. The PMF profiles under the two opposite voltages highlight how the external  
530 voltage alters the thermodynamics and kinetics of cAMP permeation by changing both the relative  
531 free energy as well as free energy barriers. One feature that emerged from this investigation was  
532 the recognition of that for a wide pore such as connexin26, the effect of voltage on the mobile  
533 charges and polarizable elements within the pore produces changes in the electrostatic field within  
534 the pore that affect permeation. These voltage-induced modifications of the reaction field alter the  
535 energetic landscape in protein-specific ways. For the connexin channel, these changes are imposed  
536 on the intrinsic dipole within the pore, which is responsible for the asymmetric effect of symmetric  
537 voltage changes on the overall PMF.

538 The primary impact of this work will be to establish a way to generate meaningful  
539 hypotheses/understanding about the basis of molecular selectivity of connexin channels and to  
540 understand how mutations of connexin proteins alter the selectivity and thereby cause human  
541 pathologies. Such hypotheses can be tested experimentally and computationally in a synergistic  
542 manner. The broader application will be studies of permeation of other biological molecules (e.g.,  
543 ATP, glutathione, IP3) known to permeate Cx26 channels, and eventually to extend the work to  
544 other connexin isoforms as validated atomic models are developed. The methods presented in this  
545 study can be applied to understand the molecular permeation through a large pore in general. Input  
546 files and raw data used to generate each figure, as well as python3 scripts for milestoning analysis  
547 are publicly available at <https://github.com/LynaLuo-Lab/Connexin-cAMP-milestoning>. Long  
548 timescale MD trajectories are publicly available on Anton2 supercomputer.

549  
550

## 551 **Methods**

### 552 **Force Field and cAMP Parameterization**

553 CHARMM36 force field was used for protein(27, 28) , POPC lipids(29), KCl, and TIP3P water  
554 (30).  $Mg^{2+}$  parameters were from Yoo and Aksimentiev(31), in which the van der Waals  
555 interaction parameters were fine-tuned to reproduce experimental osmotic pressure. For cAMP,  
556 force field parameters were first generated from CHARMM CGenFF(32). Additional dihedral  
557 fitting between imidazole and pyran groups in the cAMP structure was performed in VMD fTK

558 plugin(33). The final optimized cAMP parameters are provided in **Table S3** and  
559 <https://github.com/LynaLuo-Lab/Connexin-cAMP-milestoning>.

560

### 561 **System Setup and Equilibrium Protocol**

562 The atomistic model of Cx26 was taken from our previous work(6). The system of Cx26 embedded  
563 in a solvated 1-palmitoyl-2-oleoylphosphatidylcoline (POPC) bilayer with ions and TIP3P water  
564 molecules was built and equilibrated following the step-by-step protocol used in Membrane  
565 Builder in CHARMM-GUI website(34, 35). The terminal amino acid of each segment was capped  
566 using acetylated N-terminus (ACE) and methylated C-terminus (CT1), and three disulfide bonds  
567 were added between the residue pairs of C53 and C180, C64 and C169, C60 and C174 respectively  
568 per protomer, so the entire channel contained a total of 18 disulfide bonds, consistent with the  
569 original crystal structure (PDB ID 2ZW3). Two systems containing a single cAMP for milestoning  
570 simulations and 27 cAMP for nonequilibrium simulations were constructed (see **Table S1** for  
571 system details for Milestoning simulation and Anton2 simulation). The system was energy  
572 minimized and serially equilibrated in NVT and NPT ensembles with positional restraints using  
573 AMBER18(36). Temperature was maintained at 310.15 K using Langevin thermostat (37, 38) and  
574 1 atm was maintained by Monte Carlo barostat pressure control (39, 40). The time step was 2 fs.  
575 Cutoff for calculating van der Waals interactions and short-range electrostatic interactions was set  
576 at 12 Å and force-switched at 10 Å. Long-range electrostatic interactions were calculated using  
577 the particle mesh Ewald algorithm (41).

578

### 579 **Anton2 Simulation Protocol**

580 After 35 ns equilibrium simulation, the system was run on Anton2 supercomputer with 2.0  
581 fs timestep. Lennard-Jones interactions were truncated at 11-13 Å and long-range electrostatics  
582 were evaluated using the k-Gaussian Split Ewald method (42). Pressure regulation was  
583 accomplished via the Martyna-Tobias-Klein (MTK) barostat, to maintain 1 bar of pressure, with a  
584 tau parameter of 0.0416667 ps and reference temperature of 310.15 K. The barostat period was set  
585 to the default value of 480 ps per timestep. Temperature control was accomplished via the Nosé-  
586 Hoover thermostat with the same tau parameter. The mts parameter was set to 4 timesteps for the  
587 barostat control and 1 timestep for the temperature control. The thermostat interval was set to the  
588 default value of 24 ps per timestep. A 600 ns equilibrium simulation was finished before applying



589 voltage. Constant electric fields of -200 or +200 mV respectively were added for 2 $\mu$ s simulation  
590 time with trajectories saved every 200 ps.

591

## 592 **Milestoning MD Simulation Setup**

593 The AMBER18 CUDA version currently does not support Cartesian coordinates as a  
594 collective variable. Thus, we pinned two water molecules using high Cartesian restrain with 6000  
595 kcal mol<sup>-1</sup> Å<sup>-2</sup> force constant in the top and bottom bulk region (20 Å away from the intracellular  
596 entrance and 35 Å away from the extracellular entrance of the channel). We then used the projected  
597 distance on the z vector between the nearest pinned water oxygen and center of mass of cAMP to  
598 define the Voronoi cells along the z-axis. A cylindrical restraint with a radius of 30Å was applied  
599 to cAMP to confine the sampling in the bulk region. To prevent protein drifting, a strong harmonic  
600 distance restraint with force constant 2000 kcal mol<sup>-1</sup> Å<sup>-2</sup> along xyz-axes between the fixed water  
601 oxygen in intracellular bulk and the center of mass of the protein was added. The simulation  
602 protocol in AMBER18 is the same as above, except all milestoning simulations were run in NVT  
603 ensemble. The timestep was 2.0 fs, and each trajectory was saved every 500 frames. Confinement  
604 within the Voronoi cells was obtained using flat-harmonic restraint with force constant of 100 kcal  
605 mol<sup>-1</sup> Å<sup>-2</sup>.

606

## 607 **Convergence of PMF and MFPT**

608 A total of 53 Voronoi cells  $B_i$  are evenly distributed 2 Å apart along the z-axis, and a  
609 milestone state  $S_{ij}$  is defined as the boundary between two adjacent Voronoi cells  $B_i$  and  $B_j$ . If  $k_{i \rightarrow j}$   
610 is the rate of attempted escape from cells  $B_i$  to  $B_j$ , since at statistical equilibrium the total flux in  
611 and out of each cell is zero, thus the equilibrium probability  $\pi_i$  for the system to be in cell  $B_i$   
612 satisfies a balance equation:

$$613 \quad \sum_{j=1, j \neq i} \pi_j k_{j \rightarrow i} = \sum_{j=1, j \neq i} \pi_i k_{i \rightarrow j}, \quad \sum_{i=1} \pi_i = 1$$

614

Eq. 4

615 The free energy of each cell can be obtained from the solution of Eq. 4 as  $-k_B T \ln(\pi_i)$ .  
616 Running independent simulations in the various cells allow focused sampling on the cells with  
617 slow convergence. Here, we monitor the convergence of  $\pi_i$  on the fly by plotting the accumulated

618 rate of attempted escape on both sides of the cell  $B_i$ , called  $k_{i \rightarrow j}$  and  $k_{i \rightarrow k}$ , as well as the retention  
619 rate inside each cell  $B_i$  over time (**Figure 9a**).

620 By defining a milestone  $S_{ij}$  as the boundary between two adjacent Voronoi cells  $B_i$  and  $B_j$ ,  
621 the dynamics of the system is reduced to that of a Markov chain in the state space of the milestones  
622 indices(9). The MFPT between any pair of milestones  $S_{ij}$  and  $S_{ik}$  can hence be calculated from the  
623 rate matrix whose elements  $q_{ij,ik}$ , the rate of moving from milestone  $S_{ij}$  to  $S_{ik}$ , are given by:

$$624 \quad q_{ij,ik} = \frac{\pi_i n_{ij,ik}^i}{\pi_i r_{ij}^i + \pi_j r_{ij}^j}$$

625 Eq. 5

626 where  $n_{ij,ik}^i$  is the number of transitions from  $S_{ij}$  to  $S_{ik}$ , normalized by the time spend in cell  $B_i$ ,  
627 and  $r_{ij}^i$  is the time passed in cell  $B_i$  after having hit  $S_{ij}$  before hitting any other milestone,  
628 normalized by the total time spent in cell  $B_i$ . Therefore, after the convergence of  $\pi_i$ , the  
629 convergence of MFPT can be monitored directly from the accumulated  $n_{ij,ik}^i$  and  $r_{ij}^i$  (**Figure 9b**).  
630 The final 10 ns windowed relative RMSD is also given at the top of each panel as a measure of the  
631 degree of convergence for the corresponding rate matrix entry components. This relative RMSD  
632 within 5% (averaged over all replicas) is used as convergence criteria for all Voronoi cells, and in  
633 most cases, RMSD is below 2% of the mean value.

634

635

636

637

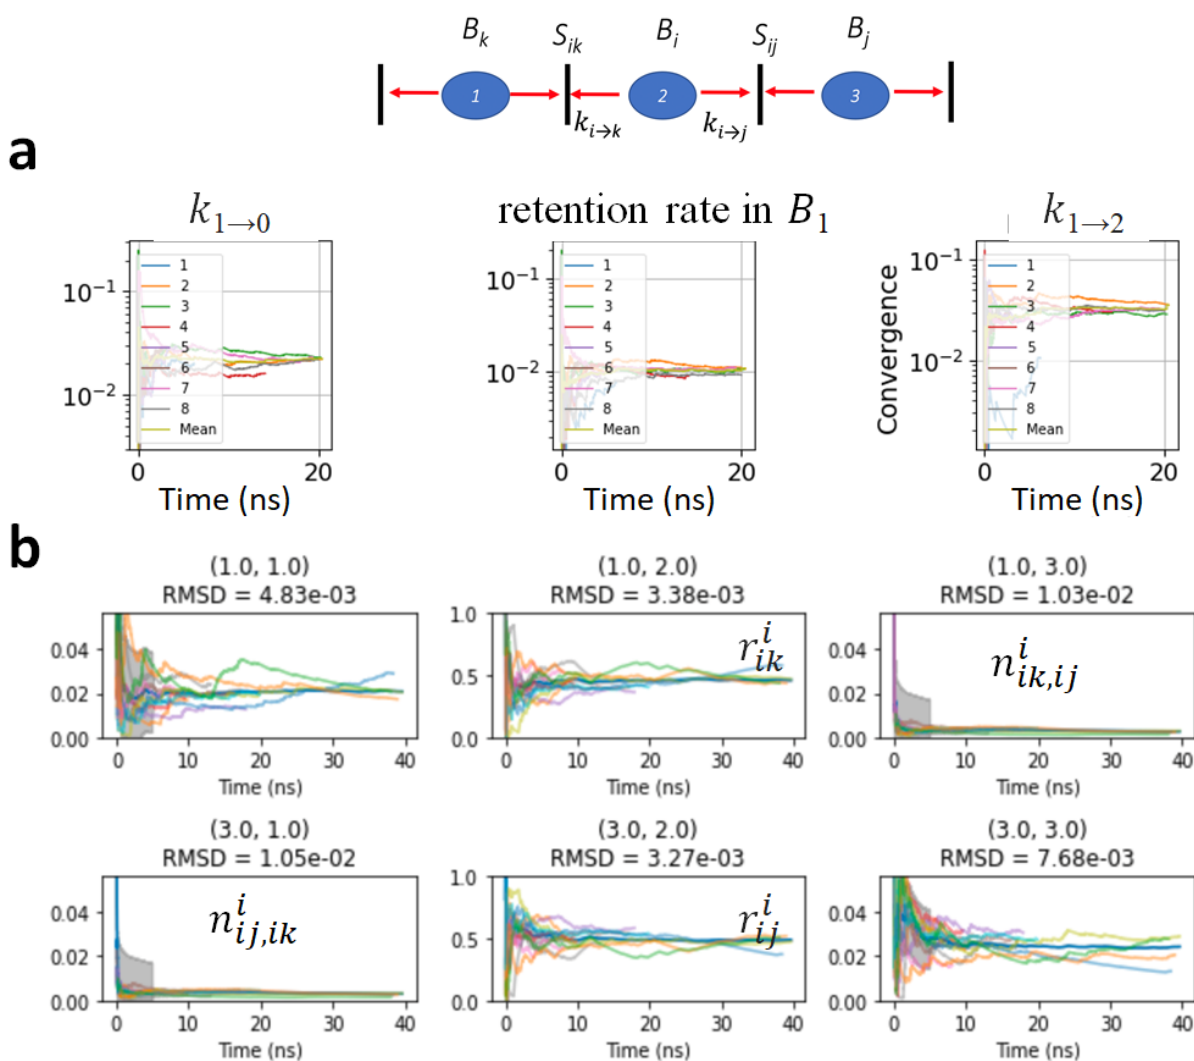

638  
 639 **Figure 9. a)** PMF convergence plots of a Voronoi cell for index 01 ( $B_1$ ) over time. The left and right plots  
 640 represent the probability of the attempted escape to the left or right milestone states,  $k_{1 \rightarrow 0}$  and  $k_{1 \rightarrow 2}$ . The  
 641 middle plot is the retention rate inside the cell. Colors represent different replicas and the mean of all the  
 642 replicas. **b)** convergence plots for MFPT for milestone cell index 2 ( $B_2$ ). The upper right and lower left  
 643 panels correspond to the frequencies of transitions from cell 1 to cell 3, and from cell 3 to cell 1, respectively  
 644 ( $n_{ij,ik}^i$  and  $n_{ik,ij}^i$ ). The upper and lower center panels correspond to the percentage of time spent in cell 2  
 645 after last touching cell 1 and 3 ( $r_{ij}^i$ ), respectively. The other two entries are not used in analysis directly but  
 646 would correspond to re-entering cell 1 or 3 after last visiting that same cell previously. The final 10 ns (last  
 647 10,000 frames) windowed relative RMSD is also given at the top of each panel as a measure of the degree  
 648 of convergence for the corresponding rate matrix entry components. The convergence plots of all 53 cells  
 649 are available on Github repository <https://github.com/LynaLuo-Lab/Connexin-cAMP-milestoning>.

650  
 651  
 652

## 653 ACKNOWLEDGMENTS

654 This work was supported by NIH Grant R01-GM130834 and WesternU intramural grant. Computational  
655 resources were provided via the Extreme Science and Engineering Discovery Environment (XSEDE)  
656 allocation TG-MCB160119, which is supported by NSF grant number ACI-154862. Anton2 computer time  
657 was provided by the Pittsburgh Supercomputing Center (PSC) through NIH Grant R01-GM116961. The  
658 Anton2 machine at PSC was generously made available by D.E.Shaw Research.

## 659 AUTHOR CONTRIBUTIONS

660 W.J. prepared the system, re-parameterized cAMP force field, and performed nonequilibrium simulations.  
661 Y-C.L. performed milestoning simulations. W.J and Y-C.L analyzed both simulation results. W.M.B-S.  
662 prepared milestoning analysis scripts in python3 and performed convergence analysis. W.M.B-S. and L.M.  
663 supervised milestoning simulation. Y.L.L, A.H, L.M, and J.C designed the project and wrote the paper with  
664 input from all authors.

665

## 666 REFERENCES

- 667 1. A. L. Harris, Connexin channel permeability to cytoplasmic molecules. *Prog Biophys Mol*  
668 *Biol* **94**, 120-143 (2007).
- 669 2. A. L. Harris, Emerging issues of connexin channels: biophysics fills the gap. *Q Rev Biophys*  
670 **34**, 325-472 (2001).
- 671 3. A. Pfenniger, A. Wohlwend, B. R. Kwak, Mutations in connexin genes and disease. *Eur J*  
672 *Clin Invest* **41**, 103-116 (2011).
- 673 4. I. E. García, P. Prado, A. Pupo, O. Jara, D. Rojas-Gómez, P. Mujica, C. Flores-Muñoz, J.  
674 González-Casanova, C. Soto-Riveros, B. I. Pinto, M. A. Retamal, C. González, A. D. Martínez,  
675 Connexinopathies: a structural and functional glimpse. *BMC Cell Biol* **17**, S17 (2016).
- 676 5. A. L. Harris, Connexin specificity of second messenger permeation: real numbers at last. *J*  
677 *Gen Physiol* **131**, 287-292 (2008).
- 678 6. Y. Luo, A. R. Rossi, A. L. Harris, Computational studies of molecular permeation through  
679 connexin26 channels. *Biophys J* **110**, 584-599 (2016).
- 680 7. A. K. Faradjian, R. Elber, Computing time scales from reaction coordinates by milestoning.  
681 *J Chem Phys* **120**, 10880-10889 (2004).
- 682 8. R. Elber, Milestoning: An Efficient Approach for Atomically Detailed Simulations of  
683 Kinetics in Biophysics. *Annu Rev Biophys* **49**, 69 (2020).
- 684 9. E. Vanden-Eijnden, M. Venturoli, Markovian milestoning with Voronoi tessellations. *J*  
685 *Chem Phys* **130**, 194101 (2009).

- 686 10. T.-Q. Yu, M. Lapelosa, E. Vanden-Eijnden, C. F. Abrams, Full kinetics of CO entry, internal  
687 diffusion, and exit in myoglobin from transition-path theory simulations. *J Am Chem Soc*  
688 **137**, 3041-3050 (2015).
- 689 11. B. R. Jagger, A. A. Ojha, R. E. Amaro, Predicting Ligand Binding Kinetics Using a Markovian  
690 Milestoning with Voronoi Tessellations Multiscale Approach. *J Chem Theory Comput* **16**,  
691 5348-5357 (2020).
- 692 12. L. Maragliano, E. Vanden-Eijnden, B. Roux, Free energy and kinetics of conformational  
693 transitions from Voronoi tessellated milestoning with restraining potentials. *J Chem*  
694 *Theory Comput* **5**, 2589-2594 (2009).
- 695 13. X. He, Y. Shen, F. R. Hung, E. E. Santiso, Heterogeneous nucleation from a supercooled  
696 ionic liquid on a carbon surface. *J Chem Phys* **145**, 211919 (2016).
- 697 14. G. Alberini, F. Benfenati, L. Maragliano, Molecular dynamics simulations of ion selectivity  
698 in a claudin-15 paracellular channel. *J Phys Chem B* **122**, 10783-10792 (2018).
- 699 15. G. Kanaporis, G. Mese, L. Valiuniene, T. W. White, P. R. Brink, V. Valiunas, Gap junction  
700 channels exhibit connexin-specific permeability to cyclic nucleotides. *J Gen Physiol* **131**,  
701 293-305 (2008).
- 702 16. V. K. Verselis, C. S. Ginter, T. A. Bargiello, Opposite voltage gating polarities of two closely  
703 related connexins. *Nature* **368**, 348-351 (1994).
- 704 17. B. I. Pinto, I. E. García, A. Pupo, M. A. Retamal, A. D. Martínez, R. Latorre, C. González,  
705 Charged residues at the first transmembrane region contribute to the voltage  
706 dependence of the slow gate of connexins. *J Biol Chem* **291**, 15740-15752 (2016).
- 707 18. H. C. Berg, *Random Walks in Biology: New and Expanded Edition*. (Princeton, 1984).
- 708 19. V. H. Hernandez, M. Bortolozzi, V. Pertegato, M. Beltramello, M. Giarin, M. Zaccolo, S.  
709 Pantano, F. Mammano, Unitary permeability of gap junction channels to second  
710 messengers measured by FRET microscopy. *Nat Methods* **4**, 353-358 (2007).
- 711 20. S. Berneche, B. Roux, A microscopic view of ion conduction through the K<sup>+</sup> channel. *Proc*  
712 *Natl Acad Sci* **100**, 8644-8648 (2003).
- 713 21. B. Roux, Statistical mechanical equilibrium theory of selective ion channels. *Biophys J* **77**,  
714 139-153 (1999).
- 715 22. B. Roux, The membrane potential and its representation by a constant electric field in  
716 computer simulations. *Biophys J* **95**, 4205-4216 (2008).
- 717 23. J. Gumbart, F. Khalili-Araghi, M. Sotomayor, B. Roux, Constant electric field simulations of  
718 the membrane potential illustrated with simple systems. *Biochim Biophys Acta* **1818**, 294-  
719 302 (2012).
- 720 24. A. Aksimentiev, K. Schulten, Imaging  $\alpha$ -hemolysin with molecular dynamics: ionic  
721 conductance, osmotic permeability, and the electrostatic potential map. *Biophys J* **88**,  
722 3745-3761 (2005).
- 723 25. T. Paramo, A. East, D. Garzón, M. B. Ulmschneider, P. J. Bond, Efficient characterization of  
724 protein cavities within molecular simulation trajectories: trj\_cavity. *J Chem Theory*  
725 *Comput* **10**, 2151-2164 (2014).
- 726 26. T. Kwon, A. L. Harris, A. Rossi, T. A. Bargiello, Molecular dynamics simulations of the Cx26  
727 hemichannel: evaluation of structural models with Brownian dynamics. *J Gen Physiol* **138**,  
728 475-493 (2011).

- 729 27. A. D. MacKerell Jr, D. Bashford, M. Bellott, R. L. Dunbrack Jr, J. D. Evanseck, M. J. Field, S.  
730 Fischer, J. Gao, H. Guo, S. Ha, D. Joseph-McCarthy, L. Kuchnir, K. Kuczera, T. K. Lau, C.  
731 Mattos, S. Michnick, T. Ngo, D. T. Nguyen, R. Stote, J. Straub, M. Watanabe, J.  
732 Wiorcikiewicz-Kuczera, D. Yin, M. Karplus, All-atom empirical potential for molecular  
733 modeling and dynamics studies of proteins. *J Phys Chem B* **102**, 3586-3616 (1998).
- 734 28. A. D. Mackerell Jr, M. Feig, C. L. Brooks III, Extending the treatment of backbone energetics  
735 in protein force fields: Limitations of gas-phase quantum mechanics in reproducing  
736 protein conformational distributions in molecular dynamics simulations. *J Comput Chem*  
737 **25**, 1400-1415 (2004).
- 738 29. J. B. Klauda, R. M. Venable, J. A. Freites, J. W. O'Connor, D. J. Tobias, C. Mondragon-  
739 Ramirez, I. Vorobyov, A. D. MacKerell Jr, R. W. Pastor, Update of the CHARMM all-atom  
740 additive force field for lipids: validation on six lipid types. *J Phys Chem B* **114**, 7830-7843  
741 (2010).
- 742 30. W. L. Jorgensen, J. Chandrasekhar, J. D. Madura, R. W. Impey, M. L. Klein, Comparison of  
743 simple potential functions for simulating liquid water. *J Chem Phys* **79**, 926-935 (1983).
- 744 31. J. Yoo, A. Aksimentiev, Improved parametrization of Li<sup>+</sup>, Na<sup>+</sup>, K<sup>+</sup>, and Mg<sup>2+</sup> ions for all-  
745 atom molecular dynamics simulations of nucleic acid systems. *J Phys Chem Lett* **3**, 45-50  
746 (2012).
- 747 32. K. Vanommeslaeghe, E. Hatcher, C. Acharya, S. Kundu, S. Zhong, J. Shim, E. Darian, O.  
748 Guvench, P. Lopes, I. Vorobyov, A. D. MacKerell Jr, CHARMM general force field: A force  
749 field for drug-like molecules compatible with the CHARMM all-atom additive biological  
750 force fields. *J Comput Chem* **31**, 671-690 (2010).
- 751 33. C. G. Mayne, J. Saam, K. Schulten, E. Tajkhorshid, J. C. Gumbart, Rapid parameterization  
752 of small molecules using the force field toolkit. *J Comput Chem* **34**, 2757-2770 (2013).
- 753 34. S. Jo, T. Kim, W. Im, Automated builder and database of protein/membrane complexes  
754 for molecular dynamics simulations. *PloS one* **2**, e880 (2007).
- 755 35. S. Jo, T. Kim, V. G. Iyer, W. Im, CHARMM-GUI: a web-based graphical user interface for  
756 CHARMM. *J Comput Chem* **29**, 1859-1865 (2008).
- 757 36. D. Case, D. Cerutti, T. Cheatham, T. Darden, R. Duke, T. Giese, H. Gohlke, A. Goetz, D.  
758 Greene, N. J. U. o. C. Homeyer, AMBER reference manual. (2018).
- 759 37. W. G. Hoover, A. J. Ladd, B. Moran, High-strain-rate plastic flow studied via  
760 nonequilibrium molecular dynamics. *Phys Rev Lett* **48**, 1818 (1982).
- 761 38. D. J. Evans, Computer "experiment" for nonlinear thermodynamics of Couette flow. *J*  
762 *Chem Phys* **78**, 3297-3302 (1983).
- 763 39. J. Åqvist, P. Wennerström, M. Nervall, S. Bjelic, B. O. Brandsdal, Molecular dynamics  
764 simulations of water and biomolecules with a Monte Carlo constant pressure algorithm.  
765 *Chem. Phys. Lett* **384**, 288-294 (2004).
- 766 40. M. P. Allen, D. J. Tildesley, *Computer simulation of liquids*. (Oxford university press, 2017).
- 767 41. T. Darden, D. York, L. Pedersen, Particle mesh Ewald: An N · log (N) method for Ewald sums  
768 in large systems. *J Chem Phys* **98**, 10089-10092 (1993).
- 769 42. Y. Shan, J. L. Klepeis, M. P. Eastwood, R. O. Dror, D. E. Shaw, Gaussian split Ewald: A fast  
770 Ewald mesh method for molecular simulation. *J Chem Phys* **122**, 054101 (2005).
- 771

772  
773  
774  
775  
776  
777

## Supporting Information

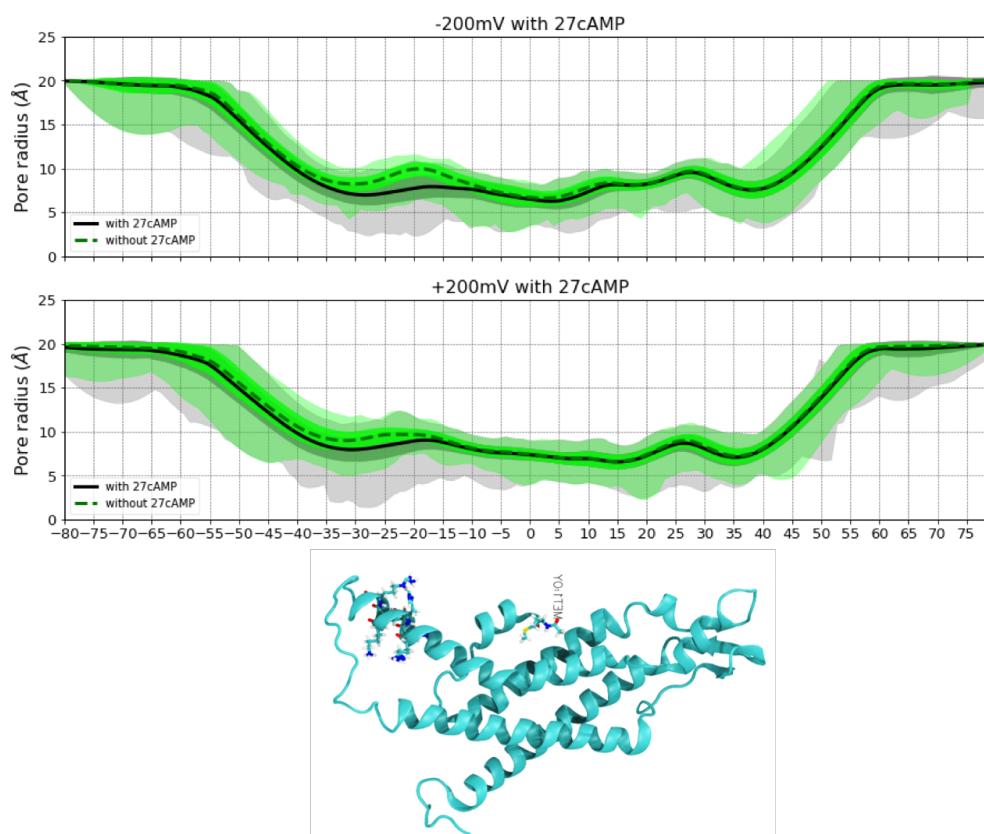

778  
779 **Figure S1.** Pore radius profiles from two simulations under +/-200 mV, calculated using Hole  
780 program. The black line is the average value over last 1  $\mu$ s, with 1.2 ns interval between snapshots.  
781 The dark grey shade represents the +/- standard deviation, the light grey shade represents the  
782 minimum and maximum radius values. The dashed line and green shade are the pore radius profile  
783 with protein only.  
784  
785  
786  
787  
788

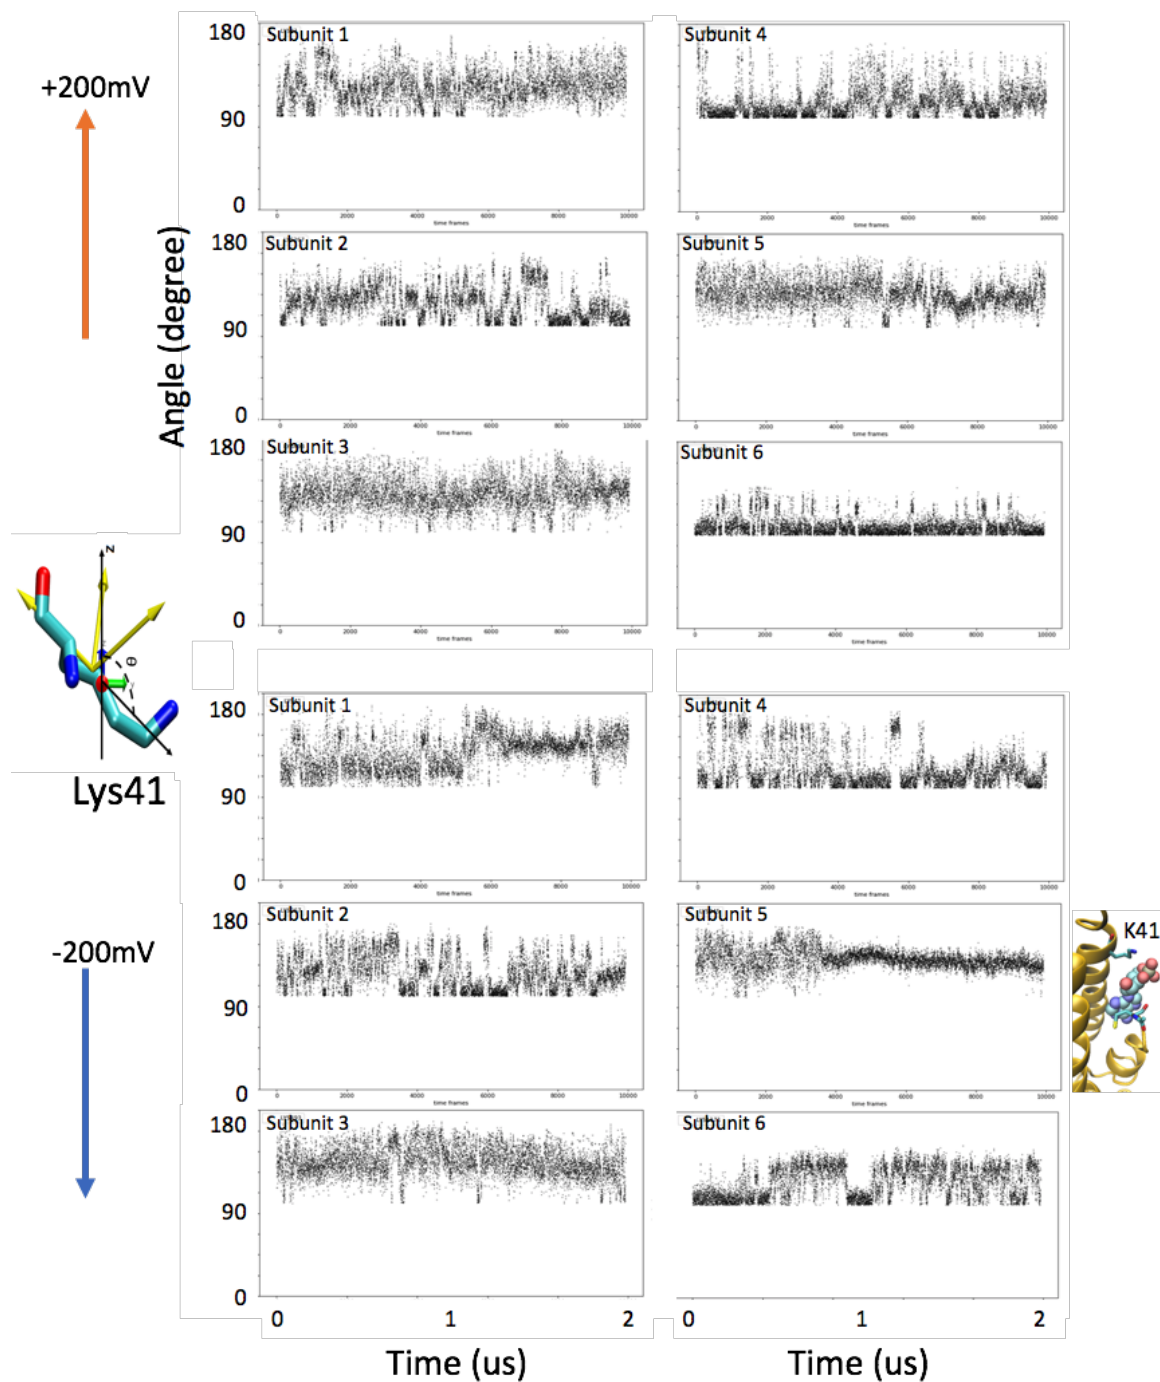

789  
790  
791  
792  
793  
794  
795  
796  
797

**Figure S2a.** Fluctuation of the angles between the principal axis of Lys41 and z-vector in each subunit under  $\pm 200$  mV. Representative Lys residue shown in the licorice model with its principal axes and the angle plotted.



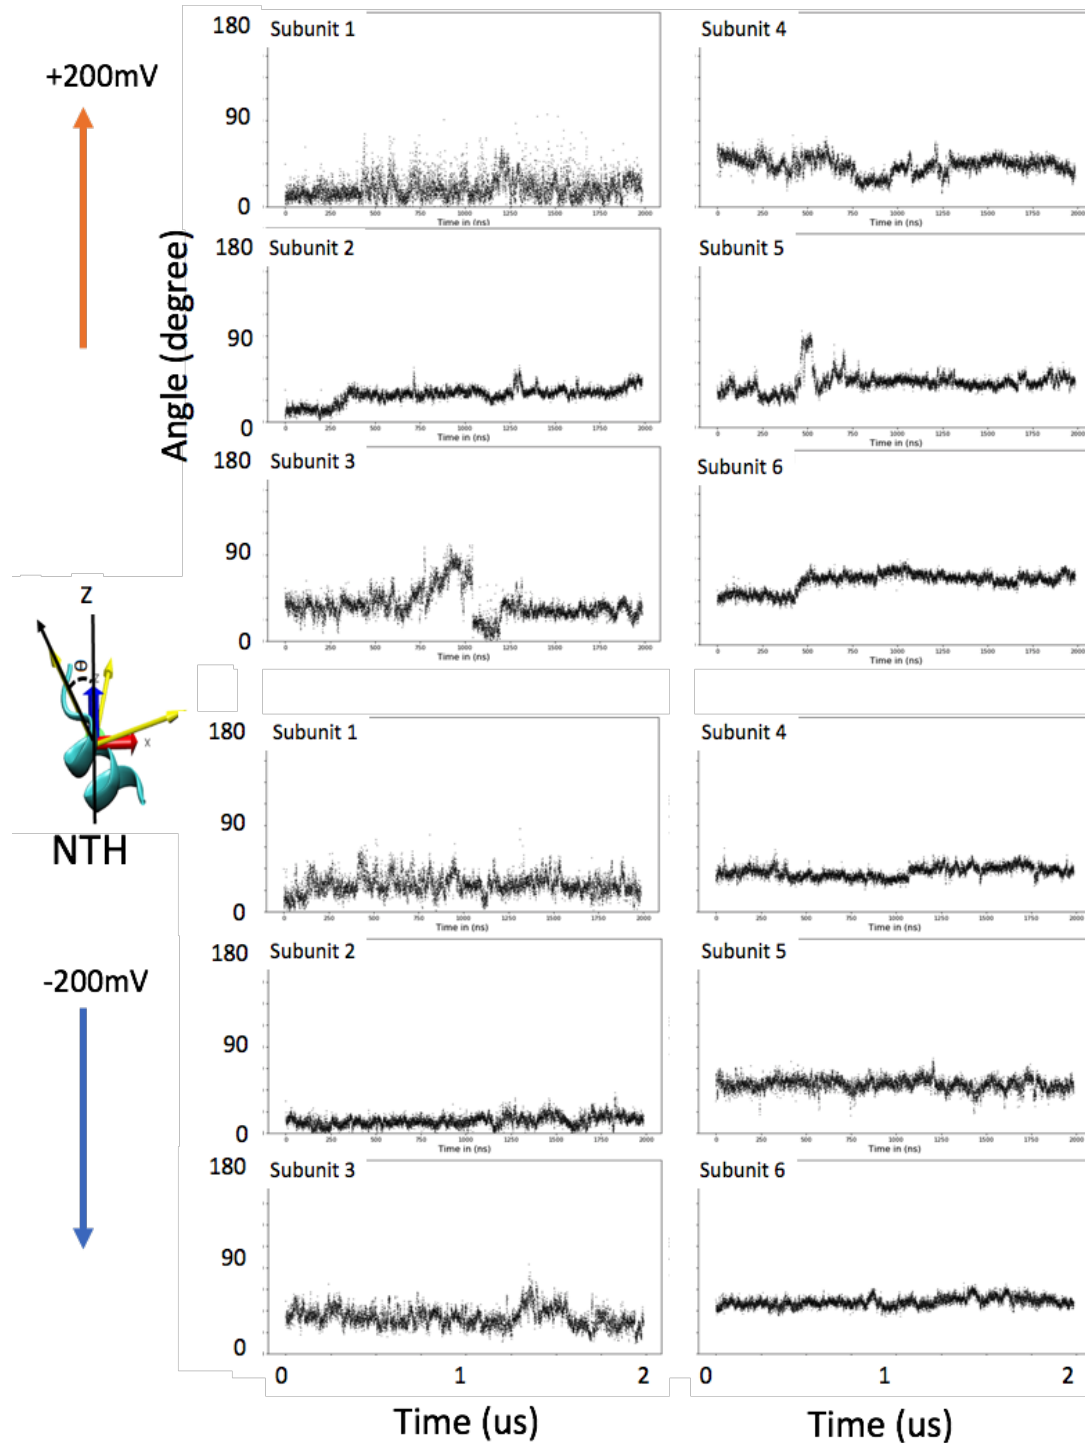

798  
799  
800  
801  
802  
803  
804  
805  
806

**Figure S2b.** Fluctuation of the angles between the principal axis of NTH (1-11) and z-vector in each subunit under  $\pm 200$  mV. Representative NTH shown in the new cartoon model with its principal axes and the angle plotted.

807 **Table S1.** Description of the computational systems

|             | Voltage   | term patching | Disulfide bonds                  | Box (Å <sup>3</sup> ) | Number (concentration*) |                 |                             |            |
|-------------|-----------|---------------|----------------------------------|-----------------------|-------------------------|-----------------|-----------------------------|------------|
|             |           |               |                                  |                       | atoms                   | cAMP            | K+/Mg2+/Cl-                 | POPC/water |
| Anton2      | +/- 200mV | ACE CT1       | C53-C180<br>C60-C174<br>C64-C169 | 122x<br>122x<br>154   | 237030                  | 27<br>(26.5 mM) | 82/27/163<br>(80/26/160 mM) | 323/56569  |
| Milestoning | 0 mV      | ACE CT1       | C53-C180<br>C60-174<br>C64-C169  | 121x<br>121x<br>155   | 234652                  | 1<br>(1 mM)     | 82/1/137<br>(81/1/135 mM)   | 324/56191  |

808 \*Concentrations were calculated based on number of water molecules.

809

810

811 **Table S2.** Transition time and dwell time (ns) from 2 μs trajectories at +200 mV and -200

812 mV.

| Transition Event | +200mV (inward flux)        |                         |                              | -200mV (outward flux)       |                         |                              |
|------------------|-----------------------------|-------------------------|------------------------------|-----------------------------|-------------------------|------------------------------|
|                  | Transition Time<br>-50<z<50 | Dwell time<br>-50<z<-20 | Barrier crossing<br>-20<z<50 | Transition Time<br>-50<z<50 | Dwell time<br>-50<z<-20 | Barrier crossing<br>-20<z<50 |
| 1                | 222                         | 24                      | 198                          | 160                         | 110                     | 50                           |
| 2                | 1218                        | 1058                    | 160                          | 242                         | 210                     | 32                           |
| 3                | 416                         | 308                     | 108                          | 290                         | 50                      | 240                          |
| 4                | 282                         | 248                     | 34                           | 1496                        | 1400                    | 96                           |
| 5                | 542                         | 498                     | 44                           | 230                         | 162                     | 68                           |
| 6                | 290                         | 149                     | 140                          | 630                         | 570                     | 60                           |
| 7                | 192                         | 120                     | 72                           | 384                         | 350                     | 34                           |
| 8                | 454                         | 222                     | 232                          | 152                         | 100                     | 52                           |
| 9                | 426                         | 150                     | 276                          | 1410                        | 1228                    | 182                          |
| 10               |                             |                         |                              | 198                         | 76                      | 122                          |
| 11               |                             |                         |                              | 390                         | 150                     | 240                          |
| 12               |                             |                         |                              | 445                         | 350                     | 95                           |
| Raw mean         | 449                         | 308                     | 140                          | 502                         | 396                     | 105                          |
| Sample mean*     | 448                         | 305                     | 143                          | 510                         | 398                     | 106                          |
| 95% CI*          | 204-1646                    | 149-940                 | 79-330                       | 249-1571                    | 205-1086                | 54-290                       |

813 \*The sample mean and confidence intervals are based on Maximum Likelihood Estimate by fitting the  
814 exponential distributions (see code at [https://github.com/LynaLuo-Lab/MD-data-uncertainty-  
815 analysis/blob/master/confidence\\_interval\\_exponential.ipynb](https://github.com/LynaLuo-Lab/MD-data-uncertainty-analysis/blob/master/confidence_interval_exponential.ipynb)).

816

817

818

819 **Table S3.** Optimized cgenff force field parameters for cAMP

| BONDS  |        |       |       |  |  |  |
|--------|--------|-------|-------|--|--|--|
| CG3RC1 | OG3R60 | 334.3 | 1.411 |  |  |  |
| OG3R60 | PG1    | 237   | 1.61  |  |  |  |

| ANGLES    |        |        |        |       |    |       |
|-----------|--------|--------|--------|-------|----|-------|
| CG3RC1    | CG321  | OG3R60 | 75.7   | 110.1 |    |       |
| CG321     | CG3RC1 | OG3C51 | 45     | 111.5 |    |       |
| CG3C51    | CG3RC1 | OG3R60 | 58     | 106.5 | 8  | 2.561 |
| CG3RC1    | CG3RC1 | OG3R60 | 53.35  | 111   | 8  | 2.561 |
| OG3R60    | CG3RC1 | HGA1   | 45.9   | 108.5 |    |       |
| CG3C51    | OG3C51 | CG3RC1 | 170    | 109   |    |       |
| CG321     | OG3R60 | PG1    | 20     | 120   | 35 | 2.33  |
| CG3RC1    | OG3R60 | PG1    | 20     | 120   | 35 | 2.33  |
| OG2P1     | PG1    | OG3R60 | 98.9   | 107.5 |    |       |
| OG3R60    | PG1    | OG3R60 | 80     | 104.3 |    |       |
| DIHEDRALS |        |        |        |       |    |       |
| OG3R60    | CG321  | CG3RC1 | CG3RC1 | 0.6   | 1  | 0     |
| OG3R60    | CG321  | CG3RC1 | CG3RC1 | 0.45  | 2  | 0     |
| OG3R60    | CG321  | CG3RC1 | CG3RC1 | 0.7   | 3  | 0     |
| OG3R60    | CG321  | CG3RC1 | OG3C51 | 3.4   | 1  | 180   |
| OG3R60    | CG321  | CG3RC1 | HGA1   | 0.195 | 3  | 0     |
| HGA2      | CG321  | CG3RC1 | OG3C51 | 0.16  | 3  | 0     |
| CG3RC1    | CG321  | OG3R60 | PG1    | 0.002 | 1  | 180   |
| CG3RC1    | CG321  | OG3R60 | PG1    | 1.14  | 2  | 180   |
| CG3RC1    | CG321  | OG3R60 | PG1    | 0.086 | 3  | 0     |
| HGA2      | CG321  | OG3R60 | PG1    | 0.599 | 3  | 0     |
| CG3RC1    | CG3C51 | CG3C51 | NG2R51 | 0     | 3  | 0     |
| CG3RC1    | CG3C51 | CG3C51 | OG3C51 | 0     | 3  | 0     |
| CG3C51    | CG3C51 | CG3RC1 | OG3R60 | 2     | 3  | 180   |
| CG3C51    | CG3C51 | CG3RC1 | OG3R60 | 0.4   | 5  | 0     |
| CG3C51    | CG3C51 | CG3RC1 | OG3R60 | 0.8   | 6  | 0     |
| OG311     | CG3C51 | CG3RC1 | OG3R60 | 0     | 3  | 0     |
| HGA1      | CG3C51 | CG3RC1 | OG3R60 | 0.195 | 3  | 0     |
| CG3C51    | CG3C51 | OG3C51 | CG3RC1 | 0.5   | 3  | 0     |
| NG2R51    | CG3C51 | OG3C51 | CG3RC1 | 0     | 3  | 0     |
| HGA1      | CG3C51 | OG3C51 | CG3RC1 | 0.3   | 3  | 0     |
| CG321     | CG3RC1 | CG3RC1 | OG3R60 | 0.15  | 3  | 0     |

|        |        |        |        |       |   |     |
|--------|--------|--------|--------|-------|---|-----|
| OG3C51 | CG3RC1 | CG3RC1 | OG3R60 | 1.2   | 3 | 0   |
| OG3R60 | CG3RC1 | CG3RC1 | HGA1   | 0.15  | 3 | 0   |
| CG321  | CG3RC1 | OG3C51 | CG3C51 | 0.3   | 3 | 0   |
| CG3RC1 | CG3RC1 | OG3C51 | CG3C51 | 0     | 3 | 0   |
| HGA1   | CG3RC1 | OG3C51 | CG3C51 | 0.3   | 3 | 0   |
| CG3C51 | CG3RC1 | OG3R60 | PG1    | 2.553 | 1 | 180 |
| CG3RC1 | CG3RC1 | OG3R60 | PG1    | 1.5   | 1 | 180 |
| CG3RC1 | CG3RC1 | OG3R60 | PG1    | 0.625 | 2 | 180 |
| CG3RC1 | CG3RC1 | OG3R60 | PG1    | 0.488 | 1 | 180 |
| CG3RC1 | CG3RC1 | OG3R60 | PG1    | 0.972 | 3 | 180 |
| HGA1   | CG3RC1 | OG3R60 | PG1    | 1.903 | 1 | 0   |
| HGA1   | CG3RC1 | OG3R60 | PG1    | 0.089 | 3 | 180 |
| CG321  | OG3R60 | PG1    | OG2P1  | 0.1   | 3 | 0   |
| CG321  | OG3R60 | PG1    | OG3R60 | 2.248 | 1 | 180 |
| CG321  | OG3R60 | PG1    | OG3R60 | 0.261 | 2 | 0   |
| CG321  | OG3R60 | PG1    | OG3R60 | 2.64  | 3 | 180 |
| CG321  | OG3R60 | PG1    | OG3R60 | 0.929 | 1 | 180 |
| CG321  | OG3R60 | PG1    | OG3R60 | 1.149 | 3 | 0   |
| CG321  | OG3R60 | PG1    | OG3R60 | 2.138 | 2 | 0   |
| CG321  | OG3R60 | PG1    | OG3R60 | 1.101 | 1 | 0   |
| CG321  | OG3R60 | PG1    | OG3R60 | 1.793 | 2 | 0   |
| CG321  | OG3R60 | PG1    | OG3R60 | 0.54  | 3 | 0   |
| CG3RC1 | OG3R60 | PG1    | OG2P1  | 0.229 | 3 | 180 |
| CG3RC1 | OG3R60 | PG1    | OG3R60 | 0.799 | 1 | 0   |
| CG3RC1 | OG3R60 | PG1    | OG3R60 | 0.137 | 2 | 0   |
| CG3RC1 | OG3R60 | PG1    | OG3R60 | 1.1   | 3 | 0   |
